# Supplementary material
Source: publisher site journal article supplement (https://www.dovepress.com/article/384215)
Supplement: Supplementary file 1 [file get_supplementary_file.php]

## **Supplemental Content**

**Supplementary Table 1.** Search Strategy

**Supplementary Table 2.** Various exercise interventions for fibromyalgia syndrome

**Supplementary Table 3.** Scales for various outcome measures

**Supplementary Table 4.** Global Inconsistency of All Outcomes

**Supplementary Table 5.** Certainty of Direct Evidence Assessment

**Supplementary Table 6.** Certainty of Network Evidence Assessment

**Supplementary Table 7.** League Tables

**Supplementary Figure 1.** Risk of Bias of Included Studies

**Supplementary Figure 2.** Rankogram for each intervention on Quality of life, Pain, Sleep, Anxiety and Depression in FMS.

**Supplementary Figure 3.** Netsplit Analysis of Inconsistency

**Supplementary Figure 4.** Network Graphs of Second Outcomes

**Supplementary Figure 5.** Comparison-Adjusted Funnel Plot

**Supplementary Appendix 1.** PRISMA NMA checklist

**Supplementary Appendix 2.** All RCTs citations included in this study

**Supplementary Table 1. Search Strategy**

| Database                                       | Retrieval date | Detailed search strategy                                                                                                                                                                                                                                                                                                                                                                                                                                                                                                                                                                                                                                                                                                                                                                                                                                                                                                                                                                                                                                                                                                                                                                                                                                                                                                                                                                                                                                    |
|------------------------------------------------|----------------|-------------------------------------------------------------------------------------------------------------------------------------------------------------------------------------------------------------------------------------------------------------------------------------------------------------------------------------------------------------------------------------------------------------------------------------------------------------------------------------------------------------------------------------------------------------------------------------------------------------------------------------------------------------------------------------------------------------------------------------------------------------------------------------------------------------------------------------------------------------------------------------------------------------------------------------------------------------------------------------------------------------------------------------------------------------------------------------------------------------------------------------------------------------------------------------------------------------------------------------------------------------------------------------------------------------------------------------------------------------------------------------------------------------------------------------------------------------|
| PubMed                                         | April 21, 2022 | <p>#1 "Fibromyalgia "[Mesh]<br/>                     #2 "fibromyalgia syndrome"[Title] OR fibromyalgi*[Title] OR fibrositis[Title]<br/>                     #3 #1 OR #2<br/>                     #4 "Exercise"[Mesh] OR "Exercise Therapy"[Mesh] OR "Exercise Movement Techniques"[Mesh] OR "Physical Fitness"[Mesh] OR "Physical Endurance"[Mesh] OR "Muscle Strength"[Mesh] OR "Muscle Fatigue"[Mesh]<br/>                     #5 exercise*[Title/Abstract] OR movement*[Title/Abstract] OR stretch*[Title/Abstract] OR aerobic*[Title/Abstract] OR anaerobic[Title/Abstract] OR walk*[Title/Abstract] OR swim*[Title/Abstract] OR cycl*[Title/Abstract] OR run*[Title/Abstract] OR yoga[Title/Abstract] OR tai chi[Title/Abstract] OR pilates[Title/Abstract]<br/>                     #6 (resistance near/3 train*[Title/Abstract]) OR stamina[Title/Abstract] OR (physical near/3 fit*[Title/Abstract]) OR ((musc*[Title/Abstract] OR neuromusc*[Title/Abstract]) near/3 fatigue)<br/>                     #7 #4 OR #5 OR #6<br/>                     #8 ("Randomized Controlled Trial"[Publication Type] OR "Controlled Clinical Trial"[Publication Type] OR "Clinical Trials as Topic"[Mesh:NoExp] OR randomized[Title/Abstract] OR placebo[Title/Abstract] OR randomly[Title/Abstract] OR Trial[Title]) NOT (animals[Mesh] NOT (humans[Mesh] AND animals[Mesh]))<br/>                     #9 #3 AND #7 AND #8</p>                                   |
| Cochrane Central Register of Controlled Trials | April 21, 2022 | <p>#1 MeSH descriptor: [Fibromyalgia] explode all trees<br/>                     #2 (fibromyalgia syndrome):ti OR (fibromyalgi*):ti OR (fibrositis):ti<br/>                     #3 #1 OR #2<br/>                     #4 MeSH descriptor: [Exercise] explode all trees<br/>                     #5 MeSH descriptor: [Exercise Therapy] explode all trees<br/>                     #6 MeSH descriptor: [Exercise Movement Techniques] explode all trees<br/>                     #7 MeSH descriptor: [Physical Fitness] explode all trees<br/>                     #8 MeSH descriptor: [Physical Endurance] explode all trees<br/>                     #9 MeSH descriptor: [Muscle Strength] explode all trees<br/>                     #10 MeSH descriptor: [Muscle Fatigue] explode all trees<br/>                     #11 (exercise*):ti,ab,kw OR (movement*):ti,ab,kw OR (stretch*):ti,ab,kw OR (aerobic*):ti,ab,kw OR (anaerobic):ti,ab,kw<br/>                     #12 (walk*):ti,ab,kw OR (swim*):ti,ab,kw OR (cycl*):ti,ab,kw OR (run*):ti,ab,kw OR (yoga):ti,ab,kw<br/>                     #13 (tai chi):ti,ab,kw OR (pilates):ti,ab,kw<br/>                     #14 (resistance near/3 train*):ti,ab,kw OR (stamina):ti,ab,kw OR (physical near/3 fit*):ti,ab,kw<br/>                     #15 ((musc* OR neuromusc*) near/3 fatigue):ti,ab,kw<br/>                     #16 #4 OR #5 OR #6 OR #7 OR #8 OR #9 #10 OR #11 OR #12 OR #13 OR #14 OR</p> |

|                           |                |                                                                                                                                                                                                                                                                                                                                                                                                                                                                                                                                                                                                                                                                                                                                                                                                                                                                                                                                                                                                                                                                                                                                          |
|---------------------------|----------------|------------------------------------------------------------------------------------------------------------------------------------------------------------------------------------------------------------------------------------------------------------------------------------------------------------------------------------------------------------------------------------------------------------------------------------------------------------------------------------------------------------------------------------------------------------------------------------------------------------------------------------------------------------------------------------------------------------------------------------------------------------------------------------------------------------------------------------------------------------------------------------------------------------------------------------------------------------------------------------------------------------------------------------------------------------------------------------------------------------------------------------------|
|                           |                | <p>#15</p> <p>#17 #3 AND #16</p>                                                                                                                                                                                                                                                                                                                                                                                                                                                                                                                                                                                                                                                                                                                                                                                                                                                                                                                                                                                                                                                                                                         |
| Embase                    | April 21, 2022 | <p>#1 'fibromyalgia'/exp/mj</p> <p>#2 'fibromyalgia syndrome':ti OR fibromyalgi*:ti OR fibrositis:ti</p> <p>#3 #1 OR #2</p> <p>#4 'exercise'/exp/mj OR 'kinesiotherapy'/exp/mj OR 'fitness'/mj OR 'endurance'/mj OR 'muscle strength'/mj OR 'muscle fatigue'/mj</p> <p>#5 exercis*:ab,ti OR movement*:ab,ti OR stretch*:ab,ti OR aerobic*:ab,ti OR anaerobic*:ab,ti OR walk*:ab,ti OR swim*:ab,ti OR cycl*:ab,ti OR run*:ab,ti OR yoga:ab,ti OR 'tai chi':ab,ti OR pilates:ab,ti</p> <p>#6 'resistance adj3 train*:ab,ti OR stamina:ab,ti OR 'physical adj3 fit*:ab,ti OR ((musc*:ab,ti OR neuromusc*:ab,ti) AND 'adj3 fatigue':ab,ti)</p> <p>#7 #4 OR #5 OR #6</p> <p>#8 'crossover procedure'/exp OR 'double blind procedure'/exp OR 'randomized controlled trial'/exp OR 'single blind procedure'/exp</p> <p>#9 random*:ti,ab,kw OR factorial*:ti,ab,kw OR crossover*:ti,ab,kw OR ((cross NEXT/1 over*):ti,ab,kw) OR placebo*:ti,ab,kw OR ((doubl* NEAR/1 blind*):ti,ab,kw) OR ((singl* NEAR/1 blind*):ti,ab,kw) OR assign*:ti,ab,kw OR allocat*:ti,ab,kw OR volunteer*:ti,ab,kw</p> <p>#10 #8 OR #9</p> <p>#11 #3 AND #7 AND #10</p> |
| NIH<br>ClinicalTrials.gov | April 21, 2022 | <p><b>Condition or disease:</b> fibromyalgia</p> <p><b>Other terms:</b> exercise</p> <p><b>Age Group:</b> Adult (16-64) OR Older Adult (65+)</p> <p><b>Sex:</b> All</p> <p><b>Study type:</b> Interventional (Clinical Trial)</p> <p><b>Study Results:</b> With Results</p>                                                                                                                                                                                                                                                                                                                                                                                                                                                                                                                                                                                                                                                                                                                                                                                                                                                              |

**Supplementary Table 2.** Various exercise interventions for fibromyalgia syndrome

| <b>Exercise Interventions</b>            | <b>Specific items</b>                                                                                                                                                               |
|------------------------------------------|-------------------------------------------------------------------------------------------------------------------------------------------------------------------------------------|
| 1. Land-based aerobic exercises, LAE     | Land aerobic exercises, Home aerobic exercises, Endurance training, Cardiovascular fitness training program, Gymnastic-based aerobic exercise program, Lifestyle physical activity* |
| 2. Pool-based aerobic exercises, PAE     | Aquatic aerobic exercises                                                                                                                                                           |
| 3. Mind-body exercises, MBE              | Pilates, Yoga, Tai Chi, Qigong, Breathing exercises, Ba-Duan-Jin                                                                                                                    |
| 4. Strength or resistance exercises, SRE | Strengthening exercises, Resistance exercises                                                                                                                                       |
| 5. Stretching exercises, STE             | Stretching exercises, Flexibility exercises, Relaxation and flexibility exercises, Family relaxation and stretching exercises                                                       |
| 6. Sensorimotor training, SME            | Sports games, Dance, Balance exercise, Core stability exercises                                                                                                                     |
| 7. Whole body vibration, WBV             | Vertical WBV, Rotational WBV                                                                                                                                                        |
| 8. Non-intervention control, NC          | As usual, Control group, waiting-list control group                                                                                                                                 |
| 9. Active control, AC                    | Individual health education, Sham movement, Relaxation                                                                                                                              |

\* Lifestyle physical activity, which involves any type of moderate-intensity activity such as walking, housecleaning, shopping, and gardening.

**Supplementary Table 3.** Scales for various outcome measures

| Outcome Measure  | Validated Scales                                                                                                                                                                                                                                          |
|------------------|-----------------------------------------------------------------------------------------------------------------------------------------------------------------------------------------------------------------------------------------------------------|
| Quality of Life  | The Fibromyalgia Impact Questionnaire (FIQ) or its modified version (FIQR)                                                                                                                                                                                |
| Pain Intensity   | Visual Analogue Scale (VAS), Faces Pain Scale (FPS), Visual Numerological Scale (VNS), Number Rating Scale (NRS), Brief Pain Inventory (BPI)                                                                                                              |
| Depression Level | Beck depression Inventory (BDI), The Center for Epidemiology Scale-Depression (CES-D), The Hospital Anxiety and Depression Scale-Depression (HADS-D), Hamilton Depression Scale (HAM-D), Visual Numerological Scale, Patient Health Questionnaire (PHQ-9) |
| Anxiety Level    | The Hospital Anxiety and Depression Scale- Anxiety (HADS-A), Beck Anxiety Inventory (BAI), State-Trait Anxiety Inventory (STAI), Visual Numerological Scale, Generalized Anxiety Disorder (GAD-7) Scale                                                   |
| Sleep Quality    | The Pittsburgh Sleep Quality Index (PSQI), Visual Numerological Scale, medical outcomes study (MOS) sleep scale                                                                                                                                           |

**Supplementary Table 4.** Global Inconsistency of All Outcomes

| <b>Outcome</b>  | <b>Q score</b> | <b>P-value</b> | <b><math>\tau^2</math></b> | <b>I<sup>2</sup></b> |
|-----------------|----------------|----------------|----------------------------|----------------------|
| Quality of life | 122.42         | 0.0001         | 5.7896                     | 65.7%                |
| Pain            | 100.81         | 0.0001         | 0.5793                     | 64.3%                |
| Sleep           | 47.61          | 0.0001         | 0.8984                     | 70.6%                |
| Anxiety         | 22.72          | 0.0650         | 1.0901                     | 38.4%                |
| Depression      | 286.88         | 0.0001         | 20.3430                    | 91.3%                |

**Supplementary Table 5. Certainty of Direct Evidence Assessment**

| Quality of life |     |                        |                      |                      |                      |                        |                       |
|-----------------|-----|------------------------|----------------------|----------------------|----------------------|------------------------|-----------------------|
| Comparison      | No. | Risk of bias           | Inconsistency        | Indirectness         | Publication bias     | SMD (95% CI)           | Certainty of evidence |
| AC vs LAE       | 2   | Not Serious            | Not Serious          | Not Serious          | Unclear <sup>1</sup> | 5.98 (1.68, 10.28)     | <b>High</b>           |
| AC vs MBE       | 1   | Not Serious            | NA <sup>2</sup>      | Not Serious          | Unclear <sup>1</sup> | 18 (-0.51, 36.51)      | <b>High</b>           |
| AC vs SRE       | 1   | Not Serious            | NA <sup>2</sup>      | Not Serious          | Unclear <sup>1</sup> | 4.9 (-3.16, 12.96)     | <b>High</b>           |
| LAE vs MBE      | 2   | Not Serious            | Not Serious          | Serious <sup>6</sup> | Unclear <sup>1</sup> | 0.4578 (-5.49, 6.41)   | <b>Moderate</b>       |
| LAE vs NC       | 9   | Serious <sup>4,5</sup> | Not Serious          | Serious <sup>6</sup> | Unclear <sup>1</sup> | -8.91 (-12.54, -5.27)  | <b>Low</b>            |
| LAE vs PAE      | 5   | Not Serious            | Not Serious          | Serious <sup>6</sup> | Unclear <sup>1</sup> | 1.75 (-1.20, 4.69)     | <b>Moderate</b>       |
| LAE vs SME      | 1   | Not Serious            | NA <sup>2</sup>      | Not Serious          | Unclear <sup>1</sup> | -15.73 (-30.07, -1.39) | <b>High</b>           |
| LAE vs STE      | 2   | Not Serious            | Serious <sup>7</sup> | Serious <sup>6</sup> | Unclear <sup>1</sup> | -0.57 (-4.51, 3.37)    | <b>Low</b>            |
| MBE vs NC       | 4   | Not Serious            | Not Serious          | Not Serious          | Unclear <sup>1</sup> | -12.99 (-17.68, -8.30) | <b>High</b>           |
| MBE vs PAE      | 1   | Not Serious            | NA <sup>2</sup>      | Not Serious          | Unclear <sup>1</sup> | -7.00 (-18.04, 4.04)   | <b>High</b>           |
| MBE vs STE      | 1   | Not Serious            | NA <sup>2</sup>      | Not Serious          | Unclear <sup>1</sup> | -14.00 (-26.43, -1.57) | <b>High</b>           |
| NC vs PAE       | 4   | Not Serious            | Not Serious          | Serious <sup>6</sup> | Unclear <sup>1</sup> | 4.07 (0.51, 7.62)      | <b>Moderate</b>       |
| NC vs SME       | 4   | Serious <sup>4</sup>   | Not Serious          | Serious <sup>6</sup> | Unclear <sup>1</sup> | 2.02 (-1.02, 5.06)     | <b>Low</b>            |
| NC vs SRE       | 4   | Serious <sup>4</sup>   | Not Serious          | Serious <sup>6</sup> | Unclear <sup>1</sup> | 11.17 (4.05, 18.30)    | <b>Low</b>            |
| NC vs STE       | 1   | Not Serious            | NA <sup>2</sup>      | Not Serious          | Unclear <sup>1</sup> | 14.87 (-1.87, 31.61)   | <b>High</b>           |
| NC vs WBV       | 3   | Not Serious            | Not Serious          | Not Serious          | Unclear <sup>1</sup> | 9.23 (4.39, 14.08)     | <b>High</b>           |
| SME vs STE      | 2   | Serious <sup>4</sup>   | Serious <sup>7</sup> | Serious <sup>6</sup> | Unclear <sup>1</sup> | -11.11 (-19.46, -2.76) | <b>Very Low</b>       |
| SRE vs STE      | 5   | Serious <sup>3</sup>   | Not Serious          | Serious <sup>6</sup> | Unclear <sup>1</sup> | -2.89 (-6.71, 0.92)    | <b>Low</b>            |
| Pain            |     |                        |                      |                      |                      |                        |                       |
| Comparison      | No. | Risk of bias           | Inconsistency        | Indirectness         | Publication bias     | SMD (95% CI)           | Certainty of evidence |
| AC vs LAE       | 2   | Not Serious            | Not Serious          | Serious <sup>6</sup> | Unclear <sup>1</sup> | 0.71 (-0.77, 2.19)     | <b>Moderate</b>       |
| AC vs MBE       | 1   | Not Serious            | NA <sup>2</sup>      | Not Serious          | Unclear <sup>1</sup> | 3.70 (1.46, 5.94)      | <b>High</b>           |
| AC vs SRE       | 1   | Not Serious            | NA <sup>2</sup>      | Not Serious          | Unclear <sup>1</sup> | 14.80 (6.02, 23.58)    | <b>High</b>           |
| LAE vs MBE      | 2   | Not Serious            | Not Serious          | Serious <sup>6</sup> | Unclear <sup>1</sup> | 0.45 (-0.76, 1.65)     | <b>Moderate</b>       |
| LAE vs NC       | 7   | Serious <sup>4</sup>   | Not Serious          | Serious <sup>6</sup> | Unclear <sup>1</sup> | -0.52 (-1.42, 0.39)    | <b>Low</b>            |
| LAE vs PAE      | 6   | Serious <sup>3,5</sup> | Serious <sup>7</sup> | Serious <sup>6</sup> | Unclear <sup>1</sup> | 0.21 (-0.61, 1.04)     | <b>Very Low</b>       |
| LAE vs SME      | 1   | Not Serious            | NA <sup>2</sup>      | Not Serious          | Unclear <sup>1</sup> | -11.13 (-26.71, 4.45)  | <b>High</b>           |
| LAE vs STE      | 1   | Not Serious            | NA <sup>2</sup>      | Not Serious          | Unclear <sup>1</sup> | -1.18 (-3.08, 0.72)    | <b>High</b>           |
| MBE vs NC       | 6   | Serious <sup>5</sup>   | Not Serious          | Serious <sup>6</sup> | Unclear <sup>1</sup> | -1.60 (-2.30, -0.90)   | <b>Low</b>            |
| MBE vs PAE      | 1   | Not Serious            | NA <sup>2</sup>      | Not Serious          | Unclear <sup>1</sup> | 0.60 (-1.31, 2.51)     | <b>High</b>           |
| MBE vs STE      | 1   | Not Serious            | NA <sup>2</sup>      | Not Serious          | Unclear <sup>1</sup> | -1.90 (-3.74, -0.06)   | <b>High</b>           |
| NC vs PAE       | 3   | Not Serious            | Not Serious          | Serious <sup>6</sup> | Unclear <sup>1</sup> | 1.30 (-0.03, 2.63)     | <b>Moderate</b>       |
| NC vs SME       | 3   | Not Serious            | Not Serious          | Serious <sup>6</sup> | Unclear <sup>1</sup> | 2.27 (1.08, 3.46)      | <b>Moderate</b>       |
| NC vs SRE       | 2   | Serious <sup>4</sup>   | Not Serious          | Not Serious          | Unclear <sup>1</sup> | 1.77 (0.17, 3.37)      | <b>Moderate</b>       |
| NC vs STE       | 1   | Not Serious            | NA <sup>2</sup>      | Not Serious          | Unclear <sup>1</sup> | 1.80 (-0.67, 4.27)     | <b>High</b>           |
| NC vs WBV       | 2   | Not Serious            | Not Serious          | Serious <sup>6</sup> | Unclear <sup>1</sup> | 1.12 (-0.14, 2.38)     | <b>Moderate</b>       |
| SME vs STE      | 2   | Serious <sup>4</sup>   | Not Serious          | Serious <sup>6</sup> | Unclear <sup>1</sup> | -0.58 (-1.99, 0.83)    | <b>Low</b>            |
| SRE vs STE      | 4   | Not Serious            | Not Serious          | Serious <sup>6</sup> | Unclear <sup>1</sup> | -0.59 (-2.07, 0.88)    | <b>Moderate</b>       |
| Sleep           |     |                        |                      |                      |                      |                        |                       |
| Comparison      | No. | Risk of bias           | Inconsistency        | Indirectness         | Publication bias     | SMD (95% CI)           | Certainty of evidence |

|            |   |                      |                 |                      |                      |                      |                 |
|------------|---|----------------------|-----------------|----------------------|----------------------|----------------------|-----------------|
| AC vs LAE  | 1 | Not Serious          | NA <sup>2</sup> | Not Serious          | Unclear <sup>1</sup> | 0.20 (-1.66, 2.06)   | <b>High</b>     |
| AC vs MBE  | 1 | Not Serious          | NA <sup>2</sup> | Not Serious          | Unclear <sup>1</sup> | 5.30 (1.19, 9.41)    | <b>High</b>     |
| LAE vs MBE | 1 | Not Serious          | NA <sup>2</sup> | Not Serious          | Unclear <sup>1</sup> | -3.70 (-7.24, -0.16) | <b>High</b>     |
| LAE vs NC  | 2 | Not Serious          | Not Serious     | Not Serious          | Unclear <sup>1</sup> | -0.18 (-6.72, 6.36)  | <b>High</b>     |
| LAE vs PAE | 1 | Not Serious          | NA <sup>2</sup> | Not Serious          | Unclear <sup>1</sup> | 0.29 (-2.13, 2.71)   | <b>High</b>     |
| MBE vs NC  | 5 | Serious <sup>5</sup> | Not Serious     | Serious <sup>6</sup> | Unclear <sup>1</sup> | 0.06 (-0.91, 1.02)   | <b>Low</b>      |
| MBE vs PAE | 1 | Not Serious          | NA <sup>2</sup> | Not Serious          | Unclear <sup>1</sup> | 0.40 (-2.51, 3.31)   | <b>High</b>     |
| NC vs PAE  | 2 | Not Serious          | Not Serious     | Serious <sup>6</sup> | Unclear <sup>1</sup> | 0.86 (-0.92, 2.63)   | <b>Moderate</b> |
| NC vs SME  | 1 | Not Serious          | NA <sup>2</sup> | Not Serious          | Unclear <sup>1</sup> | 1.03 (-1.10, 3.16)   | <b>High</b>     |
| NC vs SRE  | 3 | Serious <sup>4</sup> | Not Serious     | Serious <sup>6</sup> | Unclear <sup>1</sup> | 2.54 (0.89, 4.19)    | <b>Low</b>      |
| NC vs STE  | 1 | Not Serious          | NA <sup>2</sup> | Not Serious          | Unclear <sup>1</sup> | 1.85 (-0.45, 4.15)   | <b>High</b>     |
| NC vs WBV  | 1 | Not Serious          | NA <sup>2</sup> | Not Serious          | Unclear <sup>1</sup> | 6.95 (3.87, 10.03)   | <b>High</b>     |
| SME vs STE | 1 | Serious <sup>4</sup> | NA <sup>2</sup> | Not Serious          | Unclear <sup>1</sup> | -2.37 (-5.36, 0.62)  | <b>Moderate</b> |
| SRE vs STE | 2 | Not Serious          | Not Serious     | Not Serious          | Unclear <sup>1</sup> | -1.20 (-2.86, 0.47)  | <b>High</b>     |

### Anxiety

| Comparison | No. | Risk of bias         | Inconsistency        | Indirectness         | Publication bias     | SMD (95% CI)         | Certainty of evidence |
|------------|-----|----------------------|----------------------|----------------------|----------------------|----------------------|-----------------------|
| AC vs LAE  | 1   | Not Serious          | NA <sup>2</sup>      | Not Serious          | Unclear <sup>1</sup> | 0.60 (-1.45, 2.65)   | <b>High</b>           |
| AC vs MBE  | 1   | Not Serious          | NA <sup>2</sup>      | Not Serious          | Unclear <sup>1</sup> | -1.10 (-5.04, 2.84)  | <b>High</b>           |
| LAE vs MBE | 1   | Not Serious          | NA <sup>2</sup>      | Not Serious          | Unclear <sup>1</sup> | 0.10 (-2.54, 2.74)   | <b>High</b>           |
| LAE vs NC  | 3   | Not Serious          | Not Serious          | Serious <sup>6</sup> | Unclear <sup>1</sup> | -2.60 (-4.99, -0.22) | <b>Moderate</b>       |
| LAE vs PAE | 1   | Not Serious          | NA <sup>2</sup>      | Not Serious          | Unclear <sup>1</sup> | 1.70 (-1.32, 4.72)   | <b>High</b>           |
| LAE vs STE | 1   | Not Serious          | NA <sup>2</sup>      | Not Serious          | Unclear <sup>1</sup> | -4.83 (-9.92, 0.26)  | <b>High</b>           |
| MBE vs NC  | 3   | Serious <sup>5</sup> | Not Serious          | Serious <sup>6</sup> | Unclear <sup>1</sup> | -1.93 (-3.61, -0.25) | <b>Low</b>            |
| NC vs PAE  | 2   | Not Serious          | Not Serious          | Serious <sup>6</sup> | Unclear <sup>1</sup> | 5.29 (1.23, 9.34)    | <b>Moderate</b>       |
| NC vs SME  | 2   | Not Serious          | Not Serious          | Serious <sup>6</sup> | Unclear <sup>1</sup> | 1.79 (-0.31, 3.88)   | <b>Moderate</b>       |
| NC vs SRE  | 2   | Not Serious          | Not Serious          | Serious <sup>6</sup> | Unclear <sup>1</sup> | 1.81 (-1.42, 5.04)   | <b>Moderate</b>       |
| NC vs STE  | 1   | Not Serious          | NA <sup>2</sup>      | Not Serious          | Unclear <sup>1</sup> | 0.96 (-1.67, 3.59)   | <b>High</b>           |
| SME vs STE | 1   | Serious <sup>4</sup> | NA <sup>2</sup>      | Not Serious          | Unclear <sup>1</sup> | -1.65 (-4.14, 0.84)  | <b>Moderate</b>       |
| SRE vs STE | 3   | Serious <sup>3</sup> | Serious <sup>7</sup> | Serious <sup>6</sup> | Unclear <sup>1</sup> | -0.15 (-2.84, 2.53)  | <b>Very Low</b>       |

### Depression

| Comparison | No. | Risk of bias           | Inconsistency        | Indirectness         | Publication bias     | SMD (95% CI)         | Certainty of evidence |
|------------|-----|------------------------|----------------------|----------------------|----------------------|----------------------|-----------------------|
| AC vs LAE  | 1   | Not Serious            | NA <sup>2</sup>      | Not Serious          | Unclear <sup>1</sup> | -0.10 (-8.94, 8.74)  | <b>High</b>           |
| AC vs MBE  | 1   | Not Serious            | NA <sup>2</sup>      | Not Serious          | Unclear <sup>1</sup> | 2.30 (-7.22, 11.82)  | <b>High</b>           |
| LAE vs MBE | 1   | Not Serious            | NA <sup>2</sup>      | Not Serious          | Unclear <sup>1</sup> | 1.20 (-7.84, 10.24)  | <b>High</b>           |
| LAE vs NC  | 9   | Serious <sup>4,5</sup> | Not Serious          | Serious <sup>6</sup> | Unclear <sup>1</sup> | -4.09 (-7.84, -0.34) | <b>Low</b>            |
| LAE vs PAE | 4   | Not Serious            | Serious <sup>7</sup> | Serious <sup>6</sup> | Unclear <sup>1</sup> | 0.86 (-3.90, 5.61)   | <b>Low</b>            |
| LAE vs SME | 1   | Not Serious            | NA <sup>2</sup>      | Not Serious          | Unclear <sup>1</sup> | 7.91 (-0.99, 16.81)  | <b>High</b>           |
| LAE vs STE | 1   | Not Serious            | NA <sup>2</sup>      | Not Serious          | Unclear <sup>1</sup> | -0.74 (-10.36, 8.88) | <b>High</b>           |
| MBE vs NC  | 3   | Serious <sup>5</sup>   | Not Serious          | Serious <sup>6</sup> | Unclear <sup>1</sup> | -2.57 (-7.88, 2.74)  | <b>Low</b>            |
| NC vs PAE  | 2   | Not Serious            | Not Serious          | Serious <sup>6</sup> | Unclear <sup>1</sup> | 2.86 (-3.84, 9.57)   | <b>Moderate</b>       |
| NC vs SME  | 3   | Not Serious            | Not Serious          | Serious <sup>6</sup> | Unclear <sup>1</sup> | 7.40 (2.00, 12.80)   | <b>Moderate</b>       |
| NC vs SRE  | 2   | Not Serious            | Not Serious          | Serious <sup>6</sup> | Unclear <sup>1</sup> | 3.57 (-3.69, 10.09)  | <b>Moderate</b>       |
| NC vs STE  | 1   | Not Serious            | NA <sup>2</sup>      | Not Serious          | Unclear <sup>1</sup> | 0.95 (-8.19, 10.09)  | <b>High</b>           |
| NC vs WBV  | 1   | Not Serious            | NA <sup>2</sup>      | Not Serious          | Unclear <sup>1</sup> | 10.44 (-1.12, 22.00) | <b>High</b>           |
| SME vs STE | 2   | Serious <sup>4</sup>   | Serious <sup>7</sup> | Serious <sup>6</sup> | Unclear <sup>1</sup> | -1.99 (-8.60, 4.62)  | <b>Very Low</b>       |



|            |   |                      |                      |                      |                      |                     |                 |
|------------|---|----------------------|----------------------|----------------------|----------------------|---------------------|-----------------|
| SRE vs STE | 3 | Serious <sup>3</sup> | Serious <sup>7</sup> | Serious <sup>6</sup> | Unclear <sup>1</sup> | -1.22 (-6.79, 4.36) | <b>Very Low</b> |
|------------|---|----------------------|----------------------|----------------------|----------------------|---------------------|-----------------|

<sup>1</sup> The funnel plot or Egger's test was not performed because of insufficient information (<10 studies).

<sup>2</sup> Unable to assess because there are <2 studies available with non-zero events in both arms.

<sup>3</sup> Studies had inadequate randomization and assignments.

<sup>4</sup> Studies had incomplete outcome data given that drop-outs and people lost to follow-ups could have clinically relevant impact on the intervention effect estimates.

<sup>5</sup> Studies failed to blind outcome evaluator that might lead to measurement bias.

<sup>6</sup> There is no transitivity between studies in patient clinical characteristics, duration of intervention, or frequency of exercise. Note that in theory there should be an indirection between any two relevant trials, and only significant indirection would be considered for downgrade.

<sup>7</sup> The direction of the effect size of each included experiment was inconsistent or there was great heterogeneity.

**Supplementary Table 6. Certainty of Network Evidence Assessment**

| Comparison                    | Direct Evidence        |                       | Indirect Evidence      |                         | Network Meta-Analysis  |                       |
|-------------------------------|------------------------|-----------------------|------------------------|-------------------------|------------------------|-----------------------|
|                               | SMD (95% CI)           | Certainty of evidence | SMD (95% CI)           | Certainty of evidence   | SMD (95% CI)           | Certainty of evidence |
| <b>Quality of life (n=48)</b> |                        |                       |                        |                         |                        |                       |
| AC vs LAE                     | 5.98 (1.68, 10.28)     | High                  | 5.41 (-2.89, 13.71)    | Not needed <sup>1</sup> | 5.86 (2.04, 9.68)      | High                  |
| AC vs MBE                     | 18 (-0.51, 36.51)      | High                  | 10.93 (5.50, 16.36)    | Moderate <sup>4</sup>   | 11.49 (6.28, 16.70)    | Moderate <sup>2</sup> |
| AC vs NC                      | —                      | —                     | -0.63 (-5.04, 3.77)    | Low <sup>5</sup>        | -0.63 (-5.04, 3.77)    | Low                   |
| AC vs PAE                     | —                      | —                     | 5.85 (1.38, 10.32)     | Moderate <sup>4</sup>   | 5.85 (1.38, 10.32)     | Moderate              |
| AC vs SME                     | —                      | —                     | 2.40 (-2.68, 7.49)     | High <sup>3</sup>       | 2.40 (-2.68, 7.49)     | Moderate <sup>2</sup> |
| AC vs SRE                     | 4.9 (-3.16, 12.96)     | High                  | 7.49 (1.45, 13.53)     | Low <sup>5</sup>        | 6.56 (1.72, 11.39)     | High                  |
| AC vs STE                     | —                      | —                     | 3.15 (-1.46, 7.77)     | Low <sup>5</sup>        | 3.15 (-1.46, 7.77)     | Low                   |
| AC vs WBV                     | —                      | —                     | 8.60 (2.05, 15.15)     | Low <sup>5</sup>        | 8.60 (2.05, 15.15)     | Very Low <sup>2</sup> |
| LAE vs MBE                    | 4.9 (-3.16, 12.96)     | Moderate              | 9.26 (4.27, 14.24)     | Low <sup>5</sup>        | 5.63 (1.81, 9.45)      | Low <sup>7</sup>      |
| LAE vs NC                     | 4.9 (-3.16, 12.96)     | Low                   | -4.38 (-7.78, -0.97)   | Moderate <sup>4</sup>   | -6.49 (-8.98, -4.01)   | Moderate              |
| LAE vs PAE                    | 4.9 (-3.16, 12.96)     | Moderate              | -3.98 (-8.41, 0.45)    | Low <sup>5</sup>        | -0.01 (-2.46, 2.45)    | Low <sup>7</sup>      |
| LAE vs SME                    | 4.9 (-3.16, 12.96)     | High                  | -2.64 (-6.33, 1.05)    | Low <sup>5</sup>        | -3.46 (-7.03, 0.12)    | High                  |
| LAE vs SRE                    | —                      | —                     | 0.70 (-3.25, 4.64)     | Low <sup>5</sup>        | 0.70 (-3.25, 4.64)     | Low                   |
| LAE vs STE                    | -0.57 (-4.51, 3.37)    | Low                   | -6.46 (-11.68, -1.23)  | Low <sup>5</sup>        | -2.71 (-5.85, 0.44)    | Low                   |
| LAE vs WBV                    | —                      | —                     | 2.74 (-2.70, 8.19)     | Low <sup>5</sup>        | 2.74 (-2.70, 8.19)     | Very Low <sup>2</sup> |
| MBE vs NC                     | -12.99 (-17.68, -8.30) | High                  | -10.75 (-16.65, -4.85) | Not needed <sup>1</sup> | -12.12 (-15.79, -8.45) | High                  |
| MBE vs PAE                    | -7.00 (-18.04, 4.04)   | High                  | -5.42 (-9.80, -1.04)   | Moderate <sup>4</sup>   | -5.64 (-9.71, -1.56)   | High                  |
| MBE vs SME                    | —                      | —                     | -9.08 (-13.64, -4.53)  | Low <sup>5</sup>        | -9.08 (-13.64, -4.53)  | Low                   |
| MBE vs SRE                    | —                      | —                     | -4.93 (-10.03, 0.17)   | Low <sup>5</sup>        | -4.93 (-10.03, 0.17)   | Low                   |
| MBE vs STE                    | -14.00 (-26.43, -1.57) | High                  | -7.46 (-12.35, -2.56)  | Low <sup>5</sup>        | -8.34 (-12.89, -3.78)  | High                  |
| MBE vs WBV                    | —                      | —                     | -2.89 (-8.97, 3.19)    | High <sup>3</sup>       | -2.89 (-8.97, 3.19)    | Moderate <sup>2</sup> |
| NC vs PAE                     | 4.07 (0.51, 7.62)      | Moderate              | 9.56 (5.55, 13.56)     | Low <sup>5</sup>        | 6.48 (3.83, 9.14)      | Low <sup>7</sup>      |
| NC vs SME                     | 2.02 (-1.02, 5.06)     | Low                   | 9.95 (2.04, 17.85)     | Low <sup>5</sup>        | 3.04 (0.20, 5.87)      | Low                   |
| NC vs SRE                     | 11.17 (4.05, 18.30)    | Low                   | 5.22 (0.21, 10.23)     | Low <sup>5</sup>        | 7.19 (3.09, 11.29)     | Low                   |
| NC vs STE                     | 14.87 (-1.87, 31.61)   | High                  | 3.27 (-0.33, 6.88)     | Low <sup>5</sup>        | 3.78 (0.26, 7.31)      | High                  |
| NC vs WBV                     | 9.23 (4.39, 14.08)     | High                  | —                      | —                       | 9.23 (4.39, 14.08)     | High                  |
| PAE vs SME                    | —                      | —                     | -3.45 (-7.22, 0.33)    | Low <sup>5</sup>        | -3.45 (-7.22, 0.33)    | Low                   |
| PAE vs SRE                    | —                      | —                     | 0.71 (-3.71, 5.12)     | Low <sup>5</sup>        | 0.71 (-3.71, 5.12)     | Low                   |
| PAE vs STE                    | —                      | —                     | -2.70 (-6.49, 1.09)    | Low <sup>5</sup>        | -2.70 (-6.49, 1.09)    | Low                   |
| PAE vs WBV                    | —                      | —                     | 2.75 (-2.78, 8.28)     | Moderate <sup>4</sup>   | 2.75 (-2.78, 8.28)     | Low <sup>2</sup>      |
| SME vs SRE                    | —                      | —                     | 4.15 (-0.59, 8.90)     | Low <sup>5</sup>        | 4.15 (-0.59, 8.90)     | Low                   |
| SME vs STE                    | -11.11 (-19.46, -2.76) | Very Low              | 4.68 (-0.13, 9.48)     | Low <sup>5</sup>        | 0.75 (-3.42, 4.91)     | Very Low <sup>7</sup> |
| SME vs WBV                    | —                      | —                     | 6.20 (0.58, 11.81)     | Low <sup>5</sup>        | 6.20 (0.58, 11.81)     | Very Low <sup>2</sup> |
| SRE vs STE                    | -2.89 (-6.71, 0.92)    | Low                   | -5.09 (-12.02, 1.83)   | Low <sup>5</sup>        | -3.41 (-6.74, -0.07)   | Low                   |
| SRE vs WBV                    | —                      | —                     | 2.04 (-4.30, 8.39)     | Low <sup>5</sup>        | 2.04 (-4.30, 8.39)     | Low                   |
| STE vs WBV                    | —                      | —                     | 5.45 (-0.54, 11.44)    | High <sup>3</sup>       | 5.45 (-0.54, 11.44)    | Moderate <sup>2</sup> |
| <b>Pain (n=42)</b>            |                        |                       |                        |                         |                        |                       |
| AC vs LAE                     | 0.71 (-0.77, 2.19)     | Moderate              | 3.82 (1.53, 6.12)      | Moderate <sup>4</sup>   | 1.62 (0.38, 2.87)      | Low <sup>7</sup>      |
| AC vs MBE                     | 3.70 (1.46, 5.94)      | High                  | 1.71 (0.07, 3.35)      | Moderate <sup>4</sup>   | 2.40 (1.08, 3.73)      | High                  |
| AC vs NC                      | —                      | —                     | 0.75 (-0.59, 2.09)     | Low <sup>5</sup>        | 0.75 (-0.59, 2.09)     | Low                   |

|                     |                       |          |                      |                         |                      |                       |
|---------------------|-----------------------|----------|----------------------|-------------------------|----------------------|-----------------------|
| AC vs PAE           | —                     | —        | 2.03 (0.63, 3.43)    | Very Low <sup>6</sup>   | 2.03 (0.63, 3.43)    | Very Low              |
| AC vs SME           | —                     | —        | 2.57 (0.93, 4.20)    | Moderate <sup>4</sup>   | 2.57 (0.93, 4.20)    | Low <sup>2</sup>      |
| AC vs SRE           | 14.80 (6.02, 23.58)   | High     | 1.96 (0.14, 3.77)    | Low <sup>5</sup>        | 2.48 (0.70, 4.27)    | Low <sup>2,7</sup>    |
| AC vs STE           | —                     | —        | 1.44 (-0.11, 3.00)   | Moderate <sup>4</sup>   | 1.44 (-0.11, 3.00)   | Low <sup>2</sup>      |
| AC vs WBV           | —                     | —        | 1.87 (0.04, 3.71)    | Low <sup>5</sup>        | 1.87 (0.04, 3.71)    | Very Low <sup>2</sup> |
| LAE vs MBE          | 0.45 (-0.76, 1.65)    | Moderate | 0.97 (0.06, 1.88)    | Low <sup>5</sup>        | 0.78 (0.05, 1.51)    | Moderate              |
| LAE vs NC           | -0.52 (-1.42, 0.39)   | Low      | -1.28 (-2.24, -0.31) | Low <sup>5</sup>        | -0.87 (-1.53, 0.21)  | Low                   |
| LAE vs PAE          | 0.21 (-0.61, 1.04)    | Very Low | 0.87 (-0.42, 2.17)   | Low <sup>5</sup>        | 0.40 (-0.29, 1.10)   | Low                   |
| LAE vs SME          | -11.13 (-26.71, 4.45) | High     | 1.01 (-0.14, 2.15)   | Low <sup>5</sup>        | 0.94 (-0.20, 2.08)   | High                  |
| LAE vs SRE          | —                     | —        | 0.86 (-0.51, 2.23)   | Low <sup>5</sup>        | 0.86 (-0.51, 2.23)   | Low                   |
| LAE vs STE          | -1.18 (-3.08, 0.72)   | High     | 0.24 (-1.00, 1.48)   | Low <sup>5</sup>        | -0.18 (-1.22, 0.86)  | High                  |
| LAE vs WBV          | —                     | —        | 0.25 (-1.17, 1.67)   | Low <sup>5</sup>        | 0.25 (-1.17, 1.67)   | Low                   |
| MBE vs NC           | -1.60 (-2.30, -0.90)  | Low      | -1.81 (-2.99, -0.63) | Low <sup>5</sup>        | -1.65 (-2.26, -1.05) | Low                   |
| MBE vs PAE          | 0.60 (-1.31, 2.51)    | High     | -0.62 (-1.59, 0.34)  | Low <sup>5</sup>        | -0.38 (-1.24, 0.49)  | High                  |
| MBE vs SME          | —                     | —        | 0.16 (-0.96, 1.28)   | Low <sup>5</sup>        | 0.16 (-0.96, 1.28)   | Low                   |
| MBE vs SRE          | —                     | —        | 0.08 (-1.27, 1.43)   | Low <sup>5</sup>        | 0.08 (-1.27, 1.43)   | Low                   |
| MBE vs STE          | -1.90 (-3.74, -0.06)  | High     | -0.54 (-1.77, 0.68)  | Low <sup>5</sup>        | -0.96 (-1.98, 0.06)  | High                  |
| MBE vs WBV          | —                     | —        | -0.53 (-1.93, 0.87)  | Low <sup>5</sup>        | -0.53 (-1.93, 0.87)  | Low                   |
| NC vs PAE           | 1.30 (-0.03, 2.63)    | Moderate | 1.27 (0.27, 2.26)    | Low <sup>5</sup>        | 1.28 (0.48, 2.08)    | Moderate              |
| NC vs SME           | 2.27 (1.08, 3.46)     | Moderate | 0.78 (-1.01, 2.58)   | Low <sup>5</sup>        | 1.81 (0.82, 2.81)    | Moderate              |
| NC vs SRE           | 1.77 (0.17, 3.37)     | Moderate | 1.67 (-0.39, 3.72)   | Moderate <sup>4</sup>   | 1.73 (0.47, 3.00)    | Moderate              |
| NC vs STE           | 1.80 (-0.67, 4.27)    | High     | 0.50 (-0.55, 1.54)   | Low <sup>5</sup>        | 0.69 (-0.27, 1.66)   | High                  |
| NC vs WBV           | 1.12 (-0.14, 2.38)    | Moderate | —                    | —                       | 1.12 (-0.14, 2.38)   | Moderate              |
| PAE vs SME          | —                     | —        | 0.54 (-0.70, 1.77)   | Moderate <sup>4</sup>   | 0.54 (-0.70, 1.77)   | Moderate              |
| PAE vs SRE          | —                     | —        | 0.45 (-1.00, 1.91)   | Moderate <sup>4</sup>   | 0.45 (-1.00, 1.91)   | Moderate              |
| PAE vs STE          | —                     | —        | -0.58 (-1.75, 0.58)  | Very Low <sup>6</sup>   | -0.58 (-1.75, 0.58)  | Very Low              |
| PAE vs WBV          | —                     | —        | -0.16 (-1.65, 1.33)  | Moderate <sup>4</sup>   | -0.16 (-1.65, 1.33)  | Moderate              |
| SME vs SRE          | —                     | —        | -0.08 (-1.55, 1.39)  | Moderate <sup>4</sup>   | -0.08 (-1.55, 1.39)  | Moderate              |
| SME vs STE          | -0.58 (-1.99, 0.83)   | Low      | -1.84 (-3.48, -0.21) | Moderate <sup>4</sup>   | -1.12 (-2.19, -0.05) | Moderate              |
| SME vs WBV          | —                     | —        | -0.69 (-2.30, 0.91)  | Moderate <sup>4</sup>   | -0.69 (-2.30, 0.91)  | Low <sup>2</sup>      |
| SRE vs STE          | -0.59 (-2.07, 0.88)   | Moderate | -2.08 (-4.32, 0.17)  | Moderate <sup>4</sup>   | -1.04 (-2.27, 0.19)  | Moderate              |
| SRE vs WBV          | —                     | —        | -0.61 (-2.39, 1.17)  | Moderate <sup>4</sup>   | -0.61 (-2.39, 1.17)  | Low <sup>2</sup>      |
| STE vs WBV          | —                     | —        | 0.43 (-1.16, 2.01)   | Moderate <sup>4</sup>   | 0.43 (-1.16, 2.01)   | Low <sup>2</sup>      |
| <b>Sleep (n=21)</b> |                       |          |                      |                         |                      |                       |
| AC vs LAE           | 0.20 (-1.66, 2.06)    | High     | 6.93 (2.30, 11.57)   | Not needed <sup>1</sup> | 1.14 (-0.59, 2.86)   | Moderate <sup>7</sup> |
| AC vs MBE           | 5.30 (1.19, 9.41)     | High     | -1.43 (-4.28, 1.41)  | High <sup>3</sup>       | 0.75 (-1.59, 3.09)   | Moderate <sup>7</sup> |
| AC vs NC            | —                     | —        | 0.77 (-1.63, 3.16)   | Low <sup>5</sup>        | 0.77 (-1.63, 3.16)   | Low                   |
| AC vs PAE           | —                     | —        | 1.48 (-0.91, 3.86)   | High <sup>3</sup>       | 1.48 (-0.91, 3.86)   | High                  |
| AC vs SME           | —                     | —        | 2.57 (-0.44, 5.58)   | Low <sup>5</sup>        | 2.57 (-0.44, 5.58)   | Very Low <sup>2</sup> |
| AC vs SRE           | —                     | —        | 3.15 (0.31, 5.99)    | Low <sup>5</sup>        | 3.15 (0.31, 5.99)    | Low                   |
| AC vs STE           | —                     | —        | 1.72 (-1.20, 4.63)   | Low <sup>5</sup>        | 1.72 (-1.20, 4.63)   | Low                   |
| AC vs WBV           | —                     | —        | 7.72 (3.82, 11.62)   | Low <sup>5</sup>        | 7.72 (3.82, 11.62)   | Very Low <sup>2</sup> |
| LAE vs MBE          | -3.70 (-7.24, -0.16)  | High     | 1.05 (-1.28, 3.37)   | Low <sup>5</sup>        | -0.38 (-2.33, 1.56)  | Moderate <sup>7</sup> |
| LAE vs NC           | -0.18 (-6.72, 6.36)   | High     | -0.39 (-2.46, 1.69)  | Low <sup>5</sup>        | -0.37 (-2.35, 1.61)  | High                  |
| LAE vs PAE          | 0.29 (-2.13, 2.71)    | High     | 0.42 (-2.60, 3.44)   | Not needed <sup>1</sup> | 0.34 (-1.55, 2.23)   | High                  |
| LAE vs SME          | —                     | —        | 1.43 (-1.26, 4.12)   | High <sup>3</sup>       | 1.43 (-1.26, 4.12)   | High                  |
| LAE vs SRE          | —                     | —        | 2.02 (-0.48, 4.52)   | Low <sup>5</sup>        | 2.02 (-0.48, 4.52)   | Low                   |

|                       |                      |          |                      |                         |                      |                       |
|-----------------------|----------------------|----------|----------------------|-------------------------|----------------------|-----------------------|
| LAE vs STE            | —                    | —        | 0.58 (-2.00, 3.16)   | High <sup>3</sup>       | 0.58 (-2.00, 3.16)   | High                  |
| LAE vs WBV            | —                    | —        | 6.58 (2.93, 10.24)   | High <sup>3</sup>       | 6.58 (2.93, 10.24)   | Moderate <sup>2</sup> |
| MBE vs NC             | 0.06 (-0.91, 1.02)   | Low      | -0.32 (-3.11, 2.47)  | Moderate <sup>4</sup>   | 0.02 (-0.89, 0.93)   | Moderate              |
| MBE vs PAE            | 0.40 (-2.51, 3.31)   | High     | 0.85 (-0.92, 2.61)   | Low <sup>5</sup>        | 0.73 (-0.78, 2.24)   | High                  |
| MBE vs SME            | —                    | —        | 1.82 (-0.22, 3.85)   | Low <sup>5</sup>        | 1.82 (-0.22, 3.85)   | Low                   |
| MBE vs SRE            | —                    | —        | 2.40 (0.62, 4.18)    | Low <sup>5</sup>        | 2.40 (0.62, 4.18)    | Low                   |
| MBE vs STE            | —                    | —        | 0.97 (-0.93, 2.86)   | Low <sup>5</sup>        | 0.96 (-0.93, 2.86)   | Low                   |
| MBE vs WBV            | —                    | —        | 6.97 (3.76, 10.18)   | Low <sup>5</sup>        | 6.97 (3.76, 10.18)   | Very Low <sup>2</sup> |
| NC vs PAE             | 0.86 (-0.92, 2.63)   | Moderate | 0.43 (-1.98, 2.85)   | Low <sup>5</sup>        | 0.71 (-0.72, 2.14)   | Moderate              |
| NC vs SME             | 1.03 (-1.10, 3.16)   | High     | 3.91 (0.39, 7.42)    | Not needed <sup>1</sup> | 1.80 (-0.02, 3.62)   | High                  |
| NC vs SRE             | 2.54 (0.89, 4.19)    | Low      | 1.44 (-2.55, 5.43)   | Moderate <sup>4</sup>   | 2.38 (0.86, 3.91)    | Moderate              |
| NC vs STE             | 1.85 (-0.45, 4.15)   | High     | -0.04 (-2.44, 2.36)  | Low <sup>5</sup>        | 0.95 (-0.71, 2.61)   | High                  |
| NC vs WBV             | 6.95 (3.87, 10.03)   | High     | —                    | —                       | 6.95 (3.87, 10.03)   | Moderate <sup>2</sup> |
| PAE vs SME            | —                    | —        | 1.09 (-1.22, 3.41)   | Moderate <sup>4</sup>   | 1.09 (-1.22, 3.41)   | Moderate              |
| PAE vs SRE            | —                    | —        | 1.67 (-0.42, 3.77)   | Low <sup>5</sup>        | 1.67 (-0.42, 3.77)   | Low                   |
| PAE vs STE            | —                    | —        | 0.24 (-1.95, 2.43)   | Moderate <sup>4</sup>   | 0.24 (-1.95, 2.43)   | Moderate              |
| PAE vs WBV            | —                    | —        | 6.24 (2.85, 9.63)    | Moderate <sup>4</sup>   | 6.24 (2.85, 9.63)    | Low <sup>2</sup>      |
| SME vs SRE            | —                    | —        | 0.58 (-1.59, 2.75)   | Low <sup>5</sup>        | 0.58 (-1.59, 2.75)   | Low                   |
| SME vs STE            | -2.37 (-5.36, 0.62)  | Moderate | 0.51 (-2.32, 3.33)   | High <sup>3</sup>       | -0.85 (-2.90, 1.20)  | High                  |
| SME vs WBV            | —                    | —        | 5.15 (1.58, 8.72)    | High <sup>3</sup>       | 5.15 (1.58, 8.72)    | Moderate <sup>2</sup> |
| SRE vs STE            | -1.20 (-2.86, 0.47)  | High     | -2.71 (-6.55, 1.14)  | Not needed <sup>1</sup> | -1.44 (-2.97, 0.10)  | High                  |
| SRE vs WBV            | —                    | —        | 4.57 (1.13, 8.00)    | Low <sup>5</sup>        | 4.57 (1.13, 8.00)    | Very Low <sup>2</sup> |
| STE vs WBV            | —                    | —        | 6.00 (2.51, 9.50)    | High <sup>3</sup>       | 6.00 (2.51, 9.50)    | Moderate <sup>2</sup> |
| <b>Anxiety (n=20)</b> |                      |          |                      |                         |                      |                       |
| AC vs LAE             | 0.60 (-1.45, 2.65)   | High     | -0.53 (-4.89, 3.83)  | Not needed <sup>1</sup> | 0.40 (-1.46, 2.25)   | High                  |
| AC vs MBE             | -1.10 (-5.04, 2.84)  | High     | 0.03 (-2.74, 2.80)   | High <sup>3</sup>       | -0.34 (-2.61, 1.92)  | High                  |
| AC vs NC              | —                    | —        | -2.48 (-4.80, -0.16) | Moderate <sup>4</sup>   | -2.48 (-4.80, -0.16) | Moderate              |
| AC vs PAE             | —                    | —        | 2.35 (-0.71, 5.41)   | High <sup>3</sup>       | 2.35 (-0.71, 5.41)   | High                  |
| AC vs SME             | —                    | —        | -0.58 (-3.46, 2.30)  | Low <sup>5</sup>        | -0.58 (-3.46, 2.30)  | Low                   |
| AC vs SRE             | —                    | —        | -1.83 (-5.34, 1.68)  | Low <sup>5</sup>        | -1.83 (-5.34, 1.68)  | Very Low <sup>2</sup> |
| AC vs STE             | —                    | —        | -2.07 (-4.93, 0.80)  | High <sup>3</sup>       | -2.07 (-4.93, 0.80)  | High                  |
| LAE vs MBE            | 0.10 (-2.54, 2.74)   | High     | -1.35 (-3.61, 0.90)  | Low <sup>5</sup>        | -0.74 (-2.45, 0.97)  | High                  |
| LAE vs NC             | -2.60 (-4.99, -0.22) | Moderate | -3.11 (-5.36, -0.87) | High <sup>3</sup>       | -2.87 (-4.51, -1.24) | High                  |
| LAE vs PAE            | 1.70 (-1.32, 4.72)   | High     | 2.50 (-1.91, 6.90)   | Moderate <sup>4</sup>   | 1.95 (-0.54, 4.44)   | High                  |
| LAE vs SME            | —                    | —        | -0.97 (-3.33, 1.38)  | Moderate <sup>4</sup>   | -0.97 (-3.33, 1.38)  | Moderate              |
| LAE vs SRE            | —                    | —        | -2.23 (-5.32, 0.86)  | Moderate <sup>4</sup>   | -2.23 (-5.32, 0.86)  | Low <sup>2</sup>      |
| LAE vs STE            | -4.83 (-9.92, 0.26)  | High     | -1.84 (-4.45, 0.78)  | Low <sup>5</sup>        | -2.46 (-4.79, -0.13) | High                  |
| MBE vs NC             | -1.93 (-3.61, -0.25) | Low      | -2.79 (-5.82, 0.24)  | Moderate <sup>4</sup>   | -2.13 (-3.60, -0.66) | Moderate              |
| MBE vs PAE            | —                    | —        | 2.69 (-0.12, 5.51)   | Low <sup>5</sup>        | 2.69 (-0.12, 5.51)   | Low                   |
| MBE vs SME            | —                    | —        | -0.23 (-2.52, 2.05)  | Low <sup>5</sup>        | -0.23 (-2.52, 2.05)  | Low                   |
| MBE vs SRE            | —                    | —        | -1.49 (-4.54, 1.56)  | Low <sup>5</sup>        | -1.49 (-4.54, 1.56)  | Very Low <sup>2</sup> |
| MBE vs STE            | —                    | —        | -1.72 (-4.04, 0.59)  | Low <sup>5</sup>        | -1.72 (-4.04, 0.59)  | Low                   |
| NC vs PAE             | 5.29 (1.23, 9.34)    | Moderate | 4.49 (1.01, 7.97)    | Moderate <sup>4</sup>   | 4.83 (2.19, 7.47)    | Moderate              |
| NC vs SME             | 1.79 (-0.31, 3.88)   | Moderate | 2.19 (-1.17, 5.56)   | Low <sup>5</sup>        | 1.90 (0.12, 3.68)    | Moderate              |
| NC vs SRE             | 1.81 (-1.42, 5.04)   | Moderate | -2.08 (-7.03, 2.86)  | Very Low <sup>6</sup>   | 0.64 (-2.06, 3.35)   | Moderate              |
| NC vs STE             | 0.96 (-1.67, 3.59)   | High     | -0.13 (-2.75, 2.48)  | Very Low <sup>6</sup>   | 0.41 (-1.45, 2.27)   | High                  |
| PAE vs SME            | —                    | —        | -2.93 (-6.08, 0.23)  | Moderate <sup>4</sup>   | -2.93 (-6.08, 0.23)  | Low <sup>2</sup>      |

|                          |                      |          |                       |                         |                      |                             |
|--------------------------|----------------------|----------|-----------------------|-------------------------|----------------------|-----------------------------|
| PAE vs SRE               | —                    | —        | -4.18 (-7.92, -0.44)  | Moderate <sup>4</sup>   | -4.18 (-7.92, -0.44) | <b>Low<sup>2</sup></b>      |
| PAE vs STE               | —                    | —        | -4.42 (-7.57, -1.26)  | Low <sup>5</sup>        | -4.42 (-7.57, -1.26) | <b>Very Low<sup>2</sup></b> |
| SME vs SRE               | —                    | —        | -1.26 (-4.20, 1.69)   | Moderate <sup>4</sup>   | -1.26 (-4.20, 1.69)  | <b>Moderate</b>             |
| SME vs STE               | -1.65 (-4.14, 0.84)  | Moderate | -1.25 (-4.33, 1.84)   | Low <sup>5</sup>        | -1.49 (-3.43, 0.45)  | <b>Moderate</b>             |
| SRE vs STE               | -0.15 (-2.84, 2.53)  | Very Low | -0.84 (-8.27, 6.59)   | Low <sup>5</sup>        | -0.23 (-2.76, 2.29)  | <b>Low</b>                  |
| <b>Depression (n=31)</b> |                      |          |                       |                         |                      |                             |
| AC vs LAE                | -0.10 (-8.94, 8.74)  | High     | 2.27 (-8.55, 13.08)   | Not needed <sup>1</sup> | 0.85 (-6.00, 7.69)   | <b>High</b>                 |
| AC vs MBE                | 2.30 (-7.22, 11.82)  | High     | -0.07 (-10.28, 10.15) | Not needed <sup>1</sup> | 1.20 (-5.77, 8.17)   | <b>High</b>                 |
| AC vs NC                 | —                    | —        | -2.00 (-9.11, 5.10)   | Low <sup>5</sup>        | -2.00 (-9.11, 5.10)  | <b>Low</b>                  |
| AC vs PAE                | —                    | —        | 1.42 (-6.39, 9.23)    | Low <sup>5</sup>        | 1.42 (-6.39, 9.23)   | <b>Very Low<sup>2</sup></b> |
| AC vs SME                | —                    | —        | 4.32 (-3.87, 12.52)   | High <sup>3</sup>       | 4.32 (-3.87, 12.52)  | <b>Moderate<sup>2</sup></b> |
| AC vs SRE                | —                    | —        | 1.68 (-7.32, 10.69)   | Very Low <sup>6</sup>   | 1.68 (-7.32, 10.69)  | <b>Very Low<sup>2</sup></b> |
| AC vs STE                | —                    | —        | 0.97 (-7.42, 9.36)    | High <sup>3</sup>       | 0.97 (-7.42, 9.36)   | <b>Moderate<sup>2</sup></b> |
| AC vs WBV                | —                    | —        | 8.44 (-5.13, 22.01)   | Low <sup>5</sup>        | 8.44 (-5.13, 22.01)  | <b>Very Low<sup>2</sup></b> |
| LAE vs MBE               | 1.20 (-7.84, 10.24)  | High     | 0.03 (-5.58, 5.63)    | Low <sup>5</sup>        | 0.35 (-4.41, 5.12)   | <b>High</b>                 |
| LAE vs NC                | -4.09 (-7.84, -0.34) | Low      | -0.41 (-5.66, 4.84)   | Low <sup>5</sup>        | -2.85 (-5.90, 0.20)  | <b>Low</b>                  |
| LAE vs PAE               | 0.86 (-3.90, 5.61)   | Low      | -0.12 (-7.59, 7.35)   | Low <sup>5</sup>        | 0.57 (-3.43, 4.58)   | <b>Low</b>                  |
| LAE vs SME               | 7.91 (-0.99, 16.81)  | High     | 1.48 (-4.49, 7.45)    | Low <sup>5</sup>        | 3.48 (-1.48, 8.43)   | <b>High</b>                 |
| LAE vs SRE               | —                    | —        | 0.84 (-5.39, 7.06)    | Low <sup>5</sup>        | 0.84 (-5.39, 7.06)   | <b>Low</b>                  |
| LAE vs STE               | -0.74 (-10.36, 8.88) | High     | 0.49 (-5.75, 6.73)    | Low <sup>5</sup>        | 0.13 (-5.11, 5.36)   | <b>High</b>                 |
| LAE vs WBV               | —                    | —        | 7.59 (-4.36, 19.55)   | Low <sup>5</sup>        | 7.60 (-4.36, 19.55)  | <b>Very Low<sup>2</sup></b> |
| MBE vs NC                | -2.57 (-7.88, 2.74)  | Low      | -4.68 (-12.77, 3.42)  | Low <sup>5</sup>        | -3.20 (-7.64, 1.24)  | <b>Low</b>                  |
| MBE vs PAE               | —                    | —        | 0.22 (-5.67, 6.11)    | Low <sup>5</sup>        | 0.22 (-5.67, 6.11)   | <b>Low</b>                  |
| MBE vs SME               | —                    | —        | 3.12 (-3.05, 9.30)    | High <sup>3</sup>       | 3.12 (-3.05, 9.30)   | <b>High</b>                 |
| MBE vs SRE               | —                    | —        | 0.48 (-6.71, 7.67)    | Low <sup>5</sup>        | 0.48 (-6.71, 7.67)   | <b>Low</b>                  |
| MBE vs STE               | —                    | —        | -0.23 (-6.69, 6.24)   | Low <sup>5</sup>        | -0.23 (-6.69, 6.24)  | <b>Low</b>                  |
| MBE vs WBV               | —                    | —        | 7.24 (-5.14, 19.62)   | Low <sup>5</sup>        | 7.24 (-5.14, 19.62)  | <b>Very Low<sup>2</sup></b> |
| NC vs PAE                | 2.86 (-3.84, 9.57)   | Moderate | 3.84 (-1.94, 9.62)    | Low <sup>5</sup>        | 3.42 (-0.95, 7.80)   | <b>Moderate</b>             |
| NC vs SME                | 7.40 (2.00, 12.80)   | Moderate | 3.95 (-4.08, 11.98)   | Low <sup>5</sup>        | 6.33 (1.84, 10.81)   | <b>Moderate</b>             |
| NC vs SRE                | 3.57 (-3.69, 10.09)  | Moderate | 3.89 (-5.64, 13.43)   | Very Low <sup>6</sup>   | 3.69 (-2.09, 9.46)   | <b>Moderate</b>             |
| NC vs STE                | 0.95 (-8.19, 10.09)  | High     | 3.80 (-2.03, 9.62)    | Low <sup>5</sup>        | 2.97 (-1.94, 7.89)   | <b>High</b>                 |
| NC vs WBV                | 10.44 (-1.12, 22.00) | High     | —                     | —                       | 10.44 (-1.12, 22.00) | <b>Moderate<sup>2</sup></b> |
| PAE vs SME               | —                    | —        | 2.90 (-3.10, 8.91)    | Moderate <sup>4</sup>   | 2.90 (-3.10, 8.91)   | <b>Moderate</b>             |
| PAE vs SRE               | —                    | —        | 0.26 (-6.80, 7.32)    | Moderate <sup>4</sup>   | 0.26 (-6.80, 7.32)   | <b>Moderate</b>             |
| PAE vs STE               | —                    | —        | -0.45 (-6.72, 5.82)   | Low <sup>5</sup>        | -0.45 (-6.72, 5.82)  | <b>Low</b>                  |
| PAE vs WBV               | —                    | —        | 7.02 (-5.34, 19.38)   | Moderate <sup>4</sup>   | 7.02 (-5.34, 19.38)  | <b>Low<sup>2</sup></b>      |
| SME vs SRE               | —                    | —        | -2.64 (-9.06, 3.78)   | Moderate <sup>4</sup>   | -2.64 (-9.06, 3.78)  | <b>Moderate</b>             |
| SME vs STE               | -1.99 (-8.60, 4.62)  | Very Low | -5.25 (-13.04, 2.55)  | Moderate <sup>4</sup>   | -3.35 (-8.39, 1.69)  | <b>Moderate</b>             |
| SME vs WBV               | —                    | —        | 4.11 (-8.28, 16.51)   | Moderate <sup>4</sup>   | 4.11 (-8.28, 16.51)  | <b>Low<sup>2</sup></b>      |
| SRE vs STE               | -1.22 (-6.79, 4.36)  | Very Low | 1.88 (-10.75, 14.51)  | Moderate <sup>4</sup>   | -0.71 (-5.81, 4.39)  | <b>Moderate</b>             |
| SRE vs WBV               | —                    | —        | 6.75 (-6.17, 19.68)   | Moderate <sup>4</sup>   | 6.75 (-6.17, 19.68)  | <b>Low<sup>2</sup></b>      |
| STE vs WBV               | —                    | —        | 7.47 (-5.09, 20.02)   | High <sup>3</sup>       | 7.47 (-5.09, 20.02)  | <b>Moderate<sup>2</sup></b> |

<sup>1</sup> There is no need to rate the indirect evidence since the certainty of the direct evidence is high and the contribution of the direct evidence to the network estimate is much greater than that of the indirect evidence.

<sup>2</sup> Imprecise (wide 95% CI).

<sup>3</sup> The confidence ratings for both direct comparisons are high.

<sup>4</sup> The lower confidence rating of the two direct comparisons is moderate.

<sup>5</sup> The lower confidence rating of the two direct comparisons is low.

<sup>6</sup> The lower confidence rating of the two direct comparisons is very low.

<sup>7</sup> Incoherence between direct and indirect evidence (dominant estimate not similar to network estimate).

## Supplementary Table 7. League Tables

Effect sizes presented on the upper triangle are direct comparisons (head-to-head studies) between the row and columns; the effect sizes on the lower triangle are network meta-analyses between the column and the row. Comparisons are based on SMD (95% CI) in all outcomes.

### A. Pain

|                             |                                |                                |                                |                        |                                |                               |                                |                       |
|-----------------------------|--------------------------------|--------------------------------|--------------------------------|------------------------|--------------------------------|-------------------------------|--------------------------------|-----------------------|
| <b>AC</b>                   | 0.71<br>(-0.77, 2.19)          | <b>3.70</b><br>(1.46, 5.94)    | .                              | .                      | .                              | <b>14.80</b><br>(6.02, 23.58) | .                              | .                     |
| <b>1.62</b><br>(0.38, 2.87) | <b>LAE</b>                     | 0.45<br>(-0.76, 1.65)          | -0.52<br>(-1.42, 0.39)         | 0.21<br>(-0.61, 1.04)  | -11.13<br>(-26.71, 4.45)       | .                             | -1.18<br>(-3.08, 0.72)         | .                     |
| <b>2.40</b><br>(1.08, 3.73) | <b>0.78</b><br>(0.05, 1.51)    | <b>MBE</b>                     | <b>-1.60</b><br>(-2.30, -0.90) | 0.60<br>(-1.31, 2.51)  | .                              | .                             | <b>-1.90</b><br>(-3.74, -0.06) | .                     |
| 0.75<br>(-0.59, 2.09)       | <b>-0.87</b><br>(-1.53, -0.21) | <b>-1.65</b><br>(-2.26, -1.05) | <b>NC</b>                      | 1.30<br>(-0.03, 2.63)  | <b>2.27</b><br>(1.08, 3.46)    | <b>1.77</b><br>(0.17, 3.37)   | 1.80<br>(-0.67, 4.27)          | 1.12<br>(-0.14, 2.38) |
| <b>2.03</b><br>(0.63, 3.43) | 0.40<br>(-0.29, 1.10)          | -0.38<br>(-1.24, 0.49)         | <b>1.28</b><br>(0.48, 2.08)    | <b>PAE</b>             | .                              | .                             | .                              | .                     |
| <b>2.57</b><br>(0.93, 4.20) | 0.94<br>(-0.20, 2.08)          | 0.16<br>(-0.96, 1.28)          | <b>1.81</b><br>(0.82, 2.81)    | 0.54<br>(-0.70, 1.77)  | <b>SME</b>                     | .                             | -0.58<br>(-1.99, 0.83)         | .                     |
| <b>2.48</b><br>(0.70, 4.27) | 0.86<br>(-0.51, 2.23)          | 0.08<br>(-1.27, 1.43)          | <b>1.73</b><br>(0.47, 3.00)    | 0.45<br>(-1.00, 1.91)  | -0.08<br>(-1.55, 1.39)         | <b>SRE</b>                    | -0.59<br>(-2.07, 0.88)         | .                     |
| 1.44<br>(-0.11, 3.00)       | -0.18<br>(-1.22, 0.86)         | -0.96<br>(-1.98, 0.06)         | 0.69<br>(-0.27, 1.66)          | -0.58<br>(-1.75, 0.58) | <b>-1.12</b><br>(-2.19, -0.05) | -1.04<br>(-2.27, 0.19)        | <b>STE</b>                     | .                     |
| <b>1.87</b><br>(0.04, 3.71) | 0.25<br>(-1.17, 1.67)          | -0.53<br>(-1.93, 0.87)         | 1.12<br>(-0.14, 2.38)          | -0.16<br>(-1.65, 1.33) | -0.69<br>(-2.30, 0.91)         | -0.61<br>(-2.39, 1.17)        | 0.43<br>(-1.16, 2.01)          | <b>WBV</b>            |

### B. Sleep

|                              |                              |                                |                              |                             |                             |                             |                             |                              |
|------------------------------|------------------------------|--------------------------------|------------------------------|-----------------------------|-----------------------------|-----------------------------|-----------------------------|------------------------------|
| <b>AC</b>                    | 0.20<br>(-1.66, 2.06)        | <b>5.30</b><br>(1.19, 9.41)    | .                            | .                           | .                           | .                           | .                           | .                            |
| 1.14<br>(-0.59, 2.86)        | <b>LAE</b>                   | <b>-3.70</b><br>(-7.24, -0.16) | -0.18<br>(-6.72, 6.36)       | 0.29<br>(-2.13, 2.71)       | .                           | .                           | .                           | .                            |
| 0.75<br>(-1.59, 3.09)        | -0.38<br>(-2.33, 1.56)       | <b>MBE</b>                     | 0.06<br>(-0.91, 1.02)        | 0.40<br>(-2.51, 3.31)       | .                           | .                           | .                           | .                            |
| 0.77<br>(-1.63, 3.16)        | -0.37<br>(-2.35, 1.61)       | 0.02<br>(-0.89, 0.93)          | <b>NC</b>                    | 0.86<br>(-0.92, 2.63)       | 1.03<br>(-1.10, 3.16)       | <b>2.54</b><br>(0.89, 4.19) | 1.85<br>(-0.45, 4.15)       | <b>6.95</b><br>(3.87, 10.03) |
| 1.48<br>(-0.91, 3.86)        | 0.34<br>(-1.55, 2.23)        | 0.73<br>(-0.78, 2.24)          | 0.71<br>(-0.72, 2.14)        | <b>PAE</b>                  | .                           | .                           | .                           | .                            |
| 2.57<br>(-0.44, 5.58)        | 1.43<br>(-1.26, 4.12)        | 1.82<br>(-0.22, 3.85)          | 1.80<br>(-0.02, 3.62)        | 1.09<br>(-1.22, 3.41)       | <b>SME</b>                  | .                           | -2.37<br>(-5.36, 0.62)      | .                            |
| <b>3.15</b><br>(0.31, 5.99)  | 2.02<br>(-0.48, 4.52)        | <b>2.40</b><br>(0.62, 4.18)    | <b>2.38</b><br>(0.86, 3.91)  | 1.67<br>(-0.42, 3.77)       | 0.58<br>(-1.59, 2.75)       | <b>SRE</b>                  | -1.20<br>(-2.86, 0.47)      | .                            |
| 1.72<br>(-1.20, 4.63)        | 0.58<br>(-2.00, 3.16)        | 0.96<br>(-0.93, 2.86)          | 0.95<br>(-0.71, 2.61)        | 0.24<br>(-1.95, 2.43)       | -0.85<br>(-2.90, 1.20)      | -1.44<br>(-2.97, 0.10)      | <b>STE</b>                  | .                            |
| <b>7.72</b><br>(3.82, 11.62) | <b>6.58</b><br>(2.93, 10.24) | <b>6.97</b><br>(3.76, 10.18)   | <b>6.95</b><br>(3.87, 10.03) | <b>6.24</b><br>(2.85, 9.63) | <b>5.15</b><br>(1.58, 8.72) | <b>4.57</b><br>(1.13, 8.00) | <b>6.00</b><br>(2.51, 9.50) | <b>WBV</b>                   |

### C. Anxiety

|                                |                                |                                |                                |                                |                        |                        |                        |
|--------------------------------|--------------------------------|--------------------------------|--------------------------------|--------------------------------|------------------------|------------------------|------------------------|
| <b>AC</b>                      | 0.60<br>(-1.45, 2.65)          | -1.10<br>(-5.04, 2.84)         | .                              | .                              | .                      | .                      | .                      |
| 0.40<br>(-1.46, 2.25)          | <b>LAE</b>                     | 0.10<br>(-2.54, 2.74)          | <b>-2.60</b><br>(-4.99, -0.22) | 1.70<br>(-1.32, 4.72)          | .                      | .                      | -4.83<br>(-9.92, 0.26) |
| -0.34<br>(-2.61, 1.92)         | -0.74<br>(-2.45, 0.97)         | <b>MBE</b>                     | <b>-1.93</b><br>(-3.61, -0.25) | .                              | .                      | .                      | .                      |
| <b>-2.48</b><br>(-4.80, -0.16) | <b>-2.87</b><br>(-4.51, -1.24) | <b>-2.13</b><br>(-3.60, -0.66) | <b>NC</b>                      | <b>5.29</b><br>(1.23, 9.34)    | 1.79<br>(-0.31, 3.88)  | 1.81<br>(-1.42, 5.04)  | 0.96<br>(-1.67, 3.59)  |
| 2.35<br>(-0.71, 5.41)          | 1.95<br>(-0.54, 4.44)          | 2.69<br>(-0.12, 5.51)          | <b>4.83</b><br>(2.19, 7.47)    | <b>PAE</b>                     | .                      | .                      | .                      |
| -0.58<br>(-3.46, 2.30)         | -0.97<br>(-3.33, 1.38)         | -0.23<br>(-2.52, 2.05)         | <b>1.90</b><br>(0.12, 3.68)    | -2.93<br>(-6.08, 0.23)         | <b>SME</b>             | .                      | -1.65<br>(-4.14, 0.84) |
| -1.83<br>(-5.34, 1.68)         | -2.23<br>(-5.32, 0.86)         | -1.49<br>(-4.54, 1.56)         | 0.64<br>(-2.06, 3.35)          | <b>-4.18</b><br>(-7.92, -0.44) | -1.26<br>(-4.20, 1.69) | <b>SRE</b>             | -0.15<br>(-2.84, 2.53) |
| -2.07<br>(-4.93, 0.80)         | <b>-2.46</b><br>(-4.79, -0.13) | -1.72<br>(-4.04, 0.59)         | 0.41<br>(-1.45, 2.27)          | <b>-4.42</b><br>(-7.57, -1.26) | -1.49<br>(-3.43, 0.45) | -0.23<br>(-2.76, 2.29) | <b>STE</b>             |

## D. Depression

|                        |                        |                        |                                       |                        |                                     |                        |                         |                         |
|------------------------|------------------------|------------------------|---------------------------------------|------------------------|-------------------------------------|------------------------|-------------------------|-------------------------|
| <b>AC</b>              | -0.10<br>(-8.94, 8.74) | 2.30<br>(-7.22, 11.82) | .                                     | .                      | .                                   | .                      | .                       | .                       |
| 0.85<br>(-6.00, 7.69)  | <b>LAE</b>             | 1.20<br>(-7.84, 10.24) | <b>-4.09</b><br><b>(-7.84, -0.34)</b> | 0.86<br>(-3.90, 5.61)  | 7.91<br>(-0.99, 16.81)              | .                      | -0.74<br>(-10.36, 8.88) | .                       |
| 1.20<br>(-5.77, 8.17)  | 0.35<br>(-4.41, 5.12)  | <b>MBE</b>             | -2.57<br>(-7.88, 2.74)                | .                      | .                                   | .                      | .                       | .                       |
| -2.00<br>(-9.11, 5.10) | -2.85<br>(-5.90, 0.20) | -3.20<br>(-7.64, 1.24) | <b>NC</b>                             | 2.86<br>(-3.84, 9.57)  | <b>7.40</b><br><b>(2.00, 12.80)</b> | 3.57<br>(-3.69, 10.82) | 0.95<br>(-8.19, 10.09)  | 10.44<br>(-1.12, 22.00) |
| 1.42<br>(-6.39, 9.23)  | 0.57<br>(-3.43, 4.58)  | 0.22<br>(-5.67, 6.11)  | 3.42<br>(-0.95, 7.80)                 | <b>PAE</b>             | .                                   | .                      | .                       | .                       |
| 4.32<br>(-3.87, 12.52) | 3.48<br>(-1.48, 8.43)  | 3.12<br>(-3.05, 9.30)  | <b>6.33</b><br><b>(1.84, 10.81)</b>   | 2.90<br>(-3.10, 8.91)  | <b>SME</b>                          | .                      | -1.99<br>(-8.60, 4.62)  | .                       |
| 1.68<br>(-7.32, 10.69) | 0.84<br>(-5.39, 7.06)  | 0.48<br>(-6.71, 7.67)  | 3.69<br>(-2.09, 9.46)                 | 0.26<br>(-6.80, 7.32)  | -2.64<br>(-9.06, 3.78)              | <b>SRE</b>             | -1.22<br>(-6.79, 4.36)  | .                       |
| 0.97<br>(-7.42, 9.36)  | 0.13<br>(-5.11, 5.36)  | -0.23<br>(-6.69, 6.24) | 2.97<br>(-1.94, 7.89)                 | -0.45<br>(-6.72, 5.82) | -3.35<br>(-8.39, 1.69)              | -0.71<br>(-5.81, 4.39) | <b>STE</b>              | .                       |
| 8.44<br>(-5.13, 22.01) | 7.59<br>(-4.36, 19.55) | 7.24<br>(-5.14, 19.62) | 10.44<br>(-1.12, 22.00)               | 7.02<br>(-5.34, 19.38) | 4.11<br>(-8.28, 16.51)              | 6.75<br>(-6.17, 19.68) | 7.47<br>(-5.09, 20.02)  | <b>WBV</b>              |



# Supplementary Figure 1. Risk of Bias of Included Studies

## Risk of bias graph

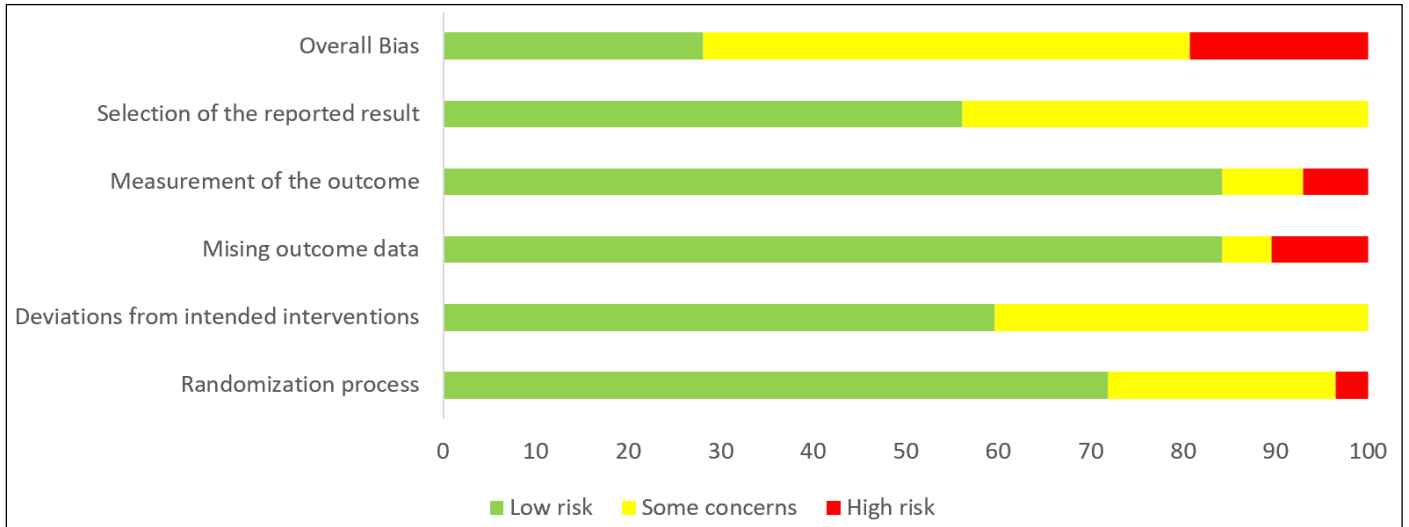

## Risk of bias summary

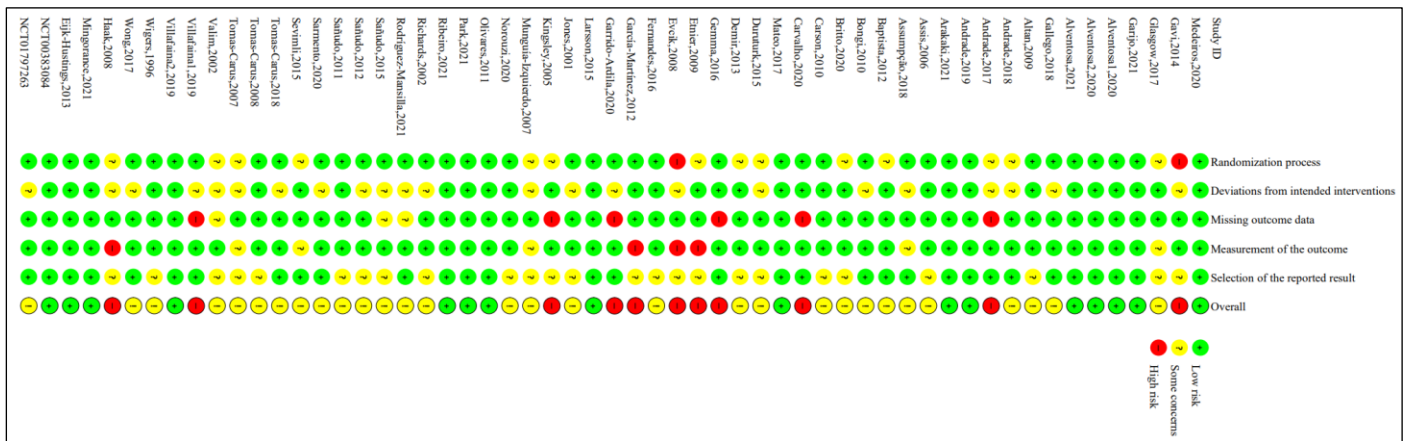

**Supplementary Figure 2.** Rankogram for each intervention on Quality of life, Pain, Sleep, Anxiety and Depression in FMS.

**A. Quality of life**

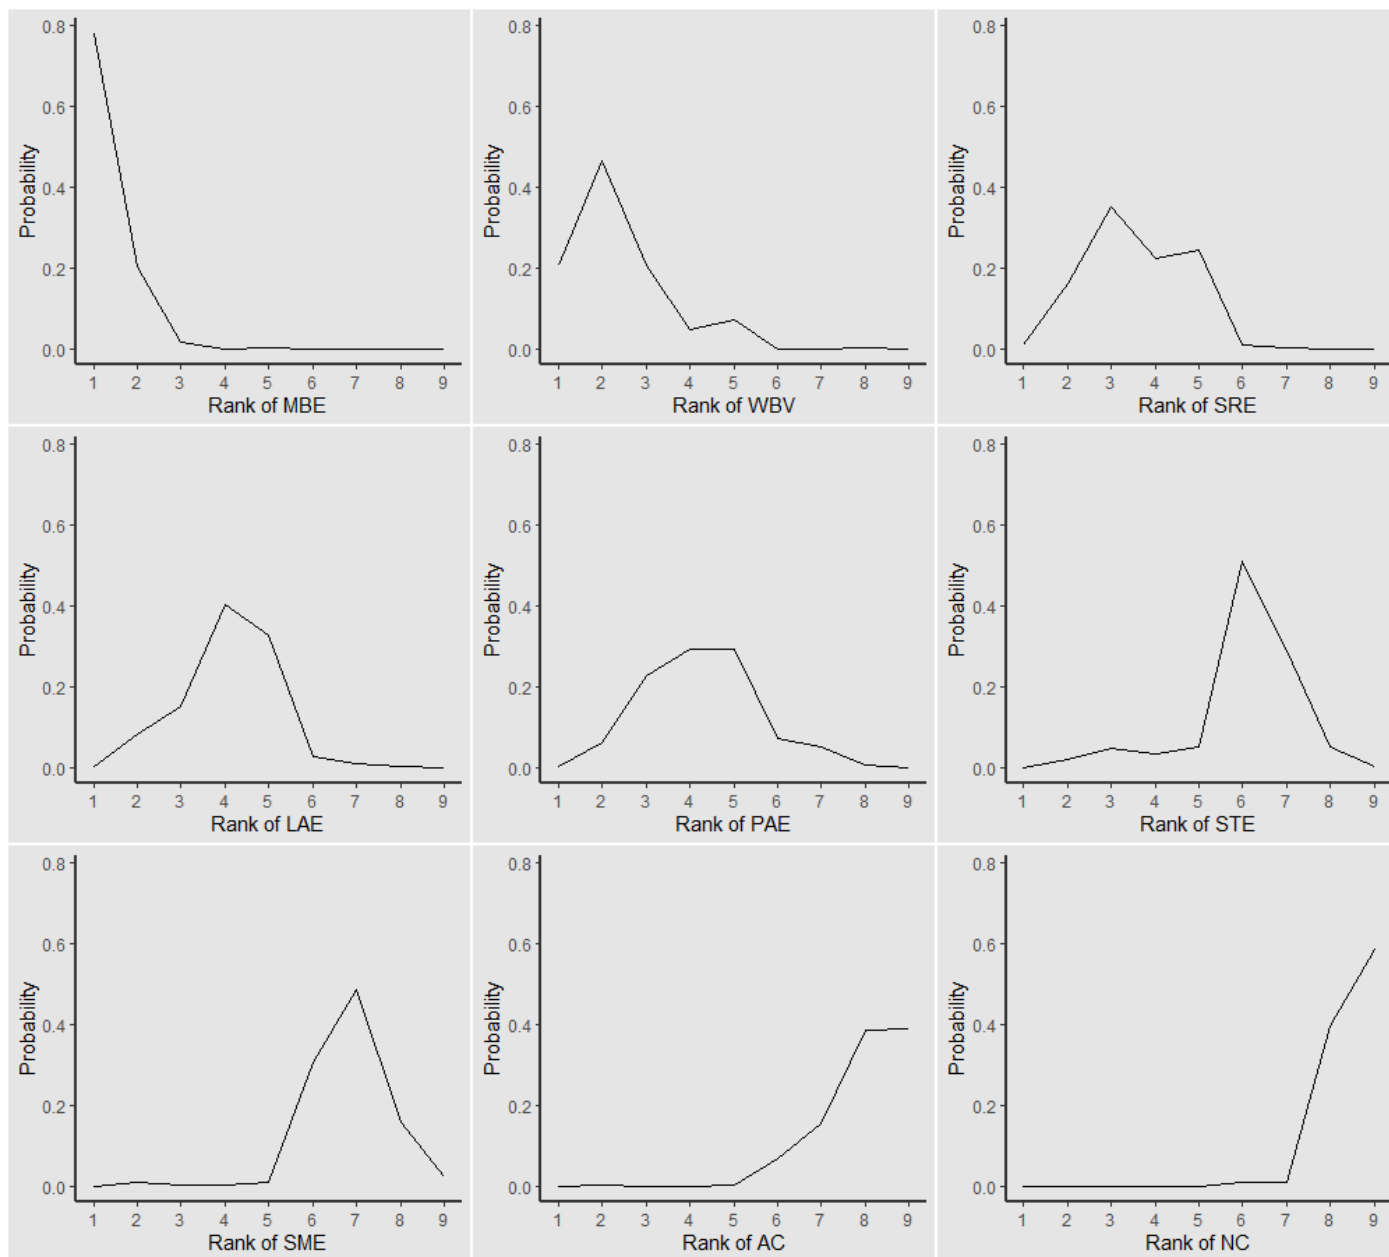

## B. Pain

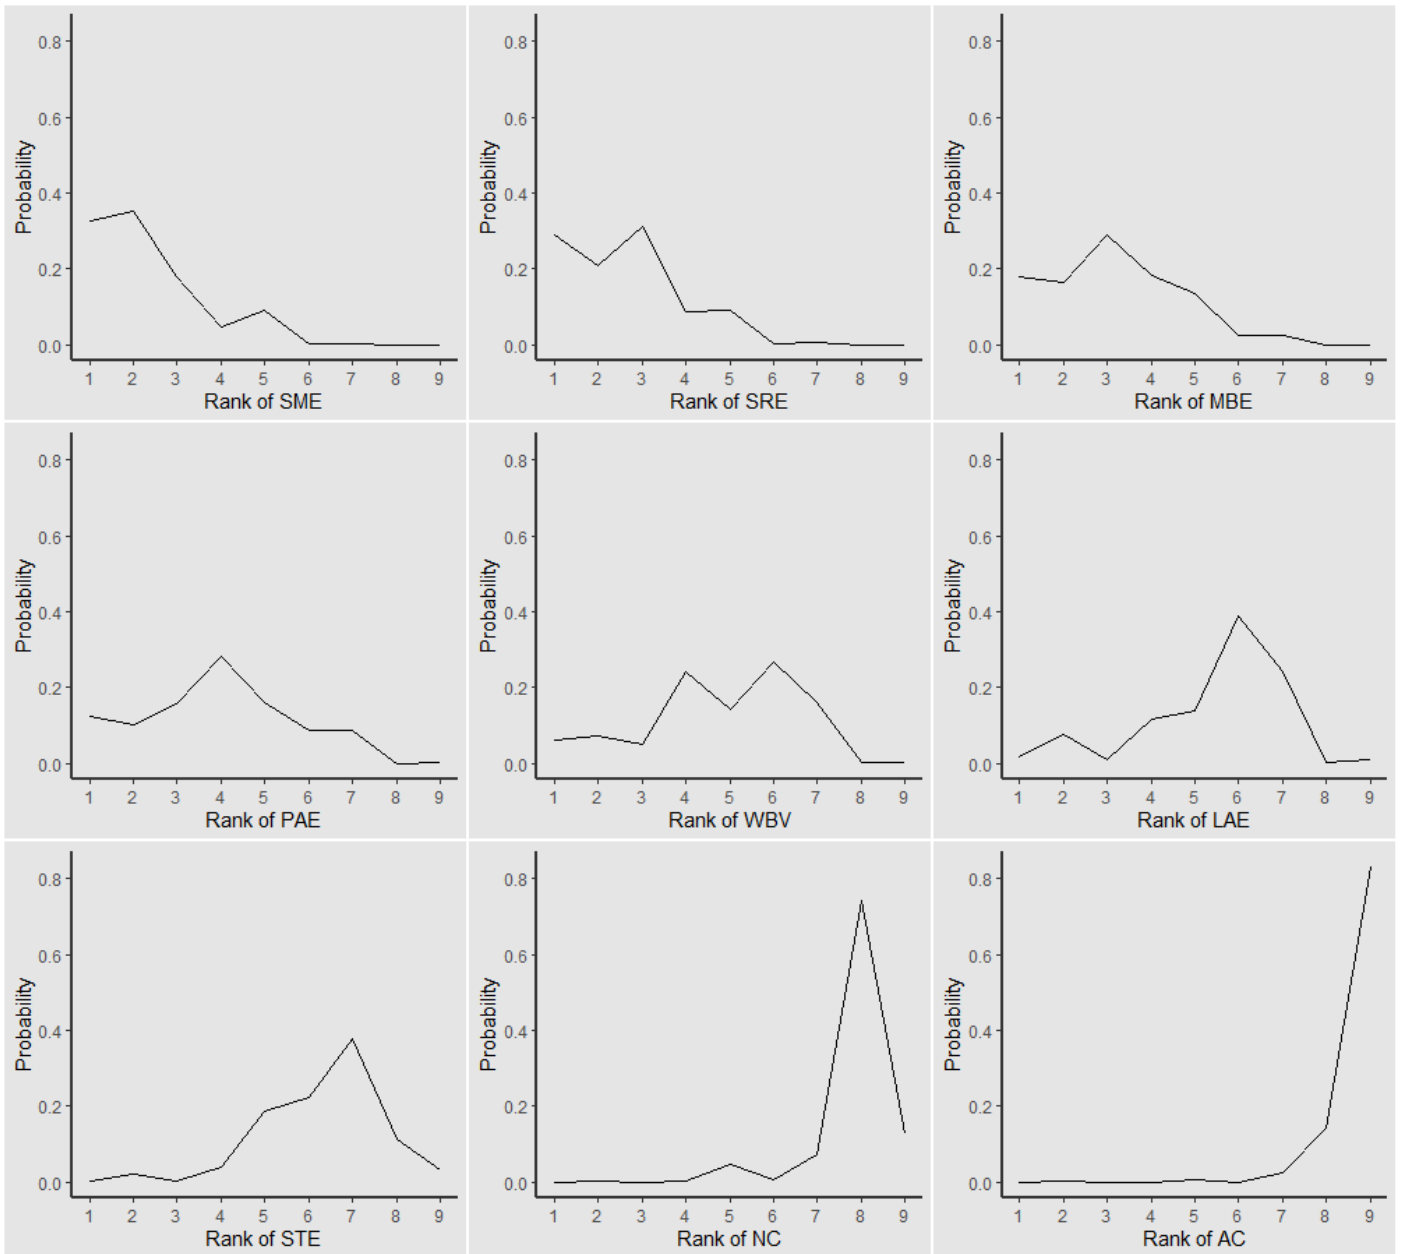

### C. Sleep

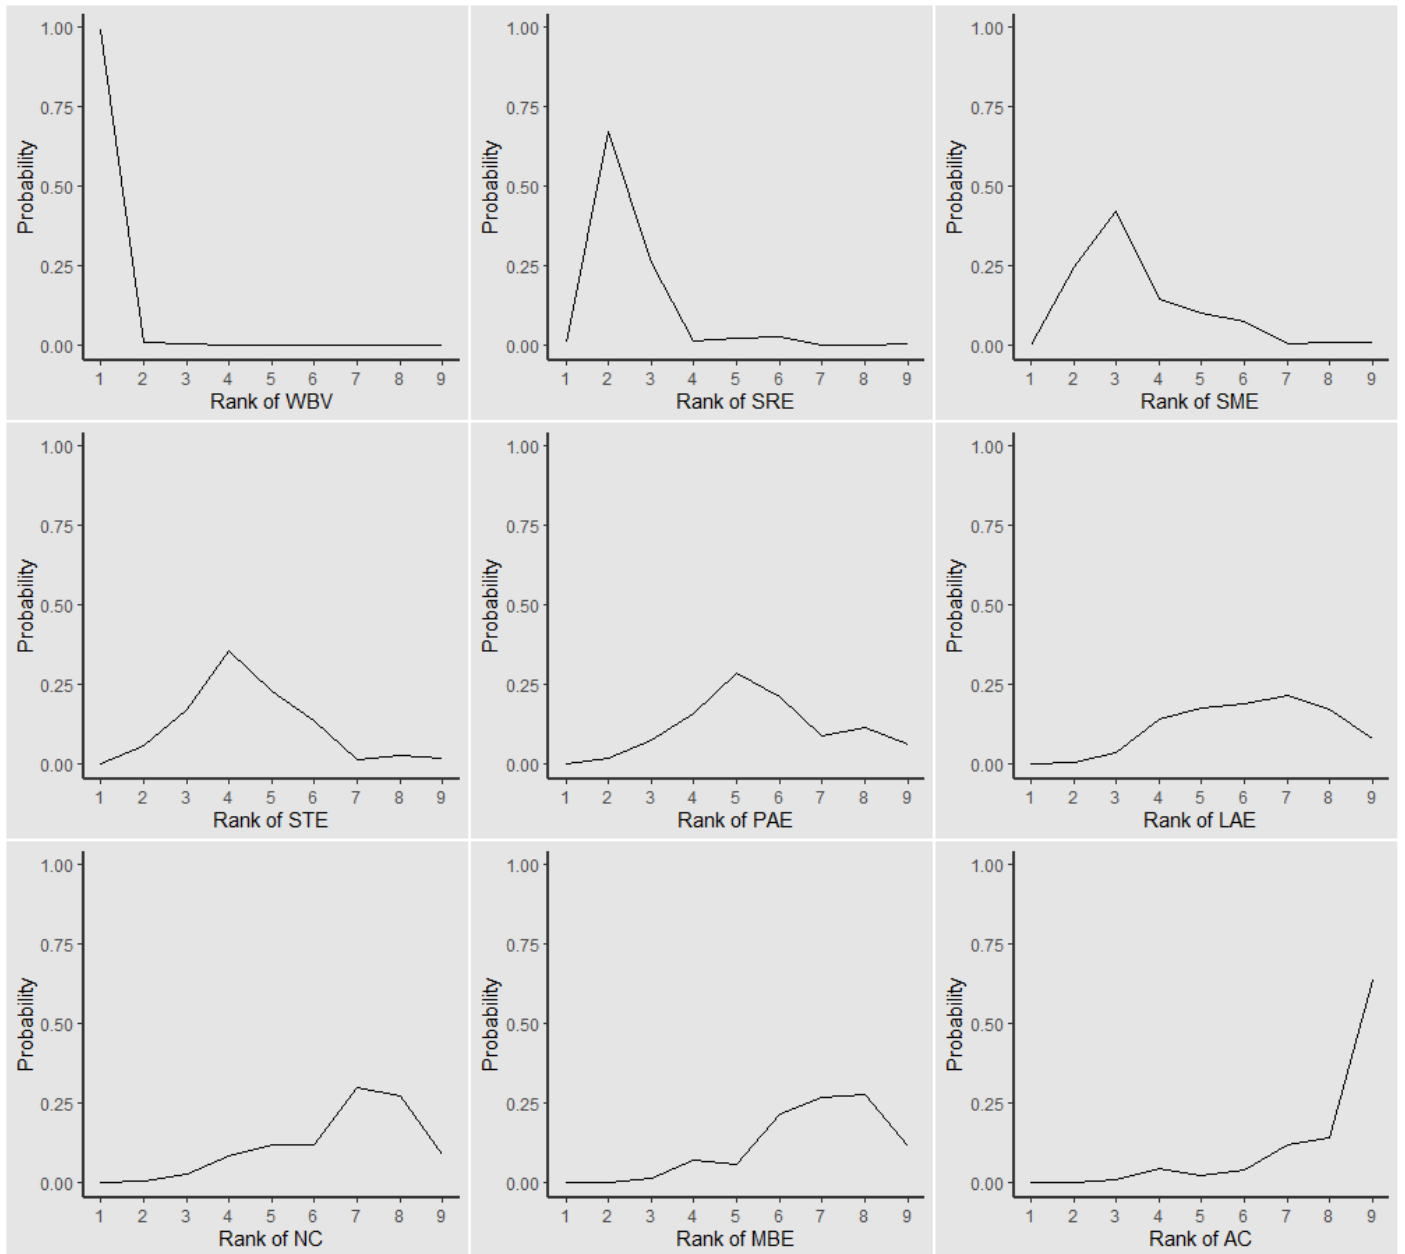

## D. Anxiety

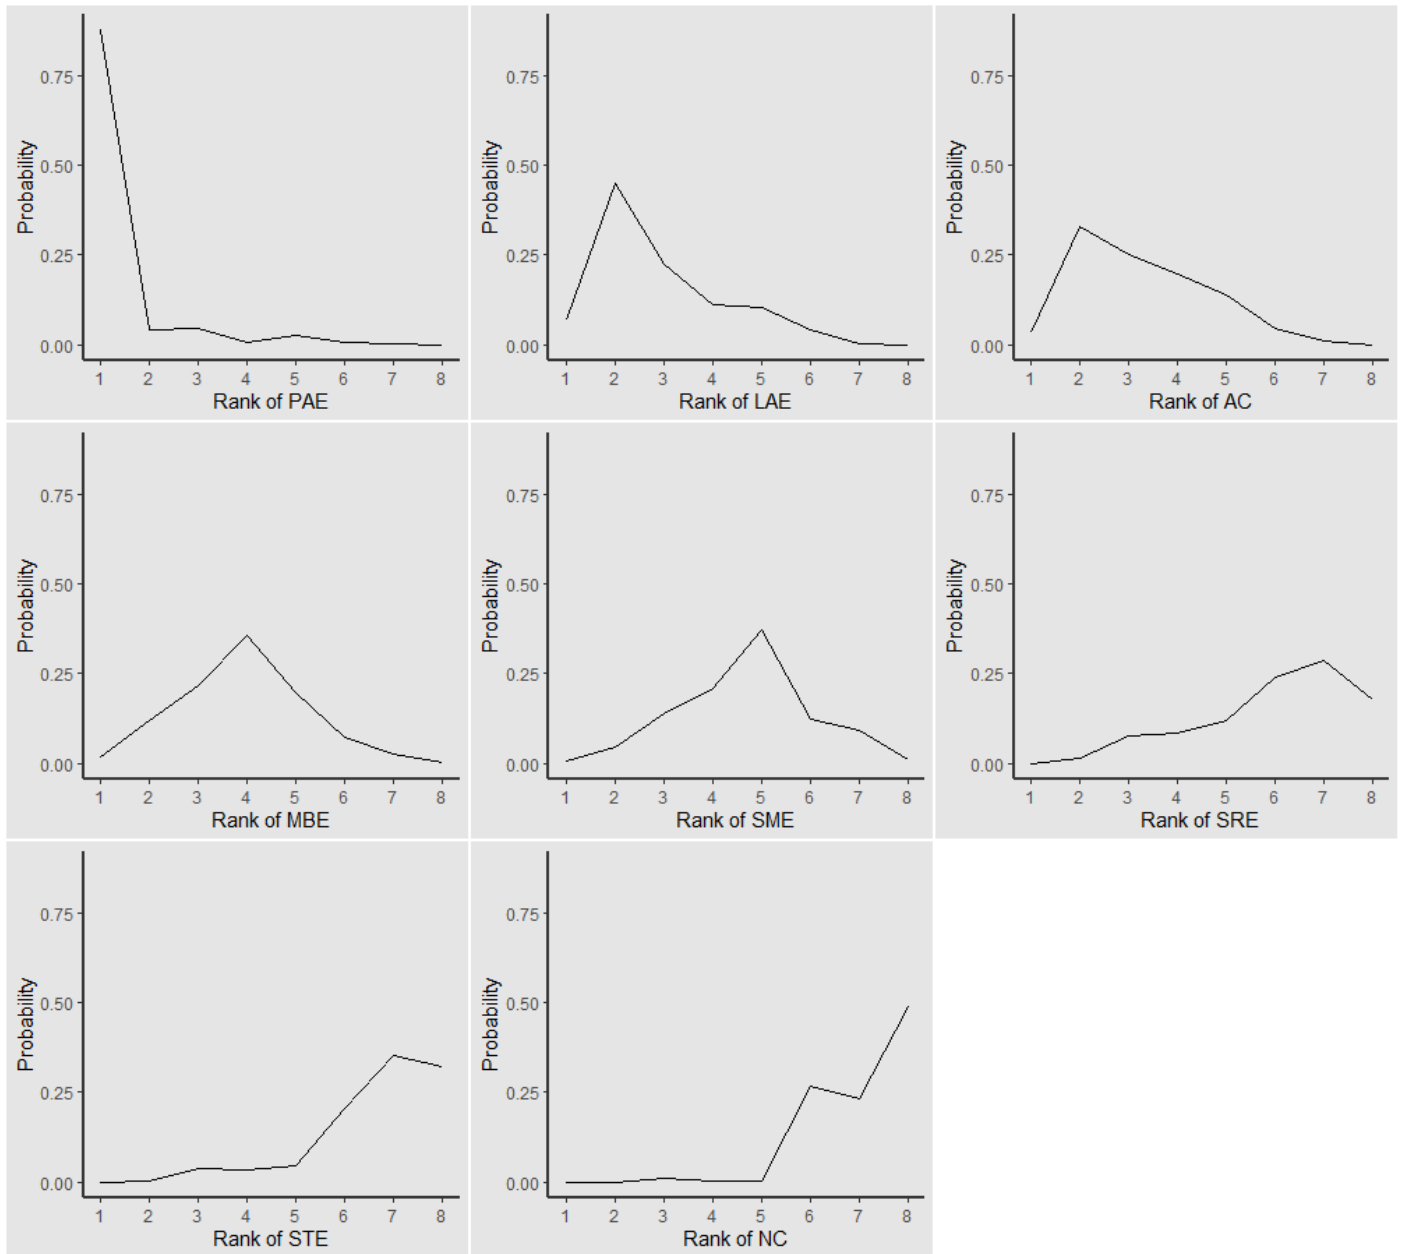

## E. Depression

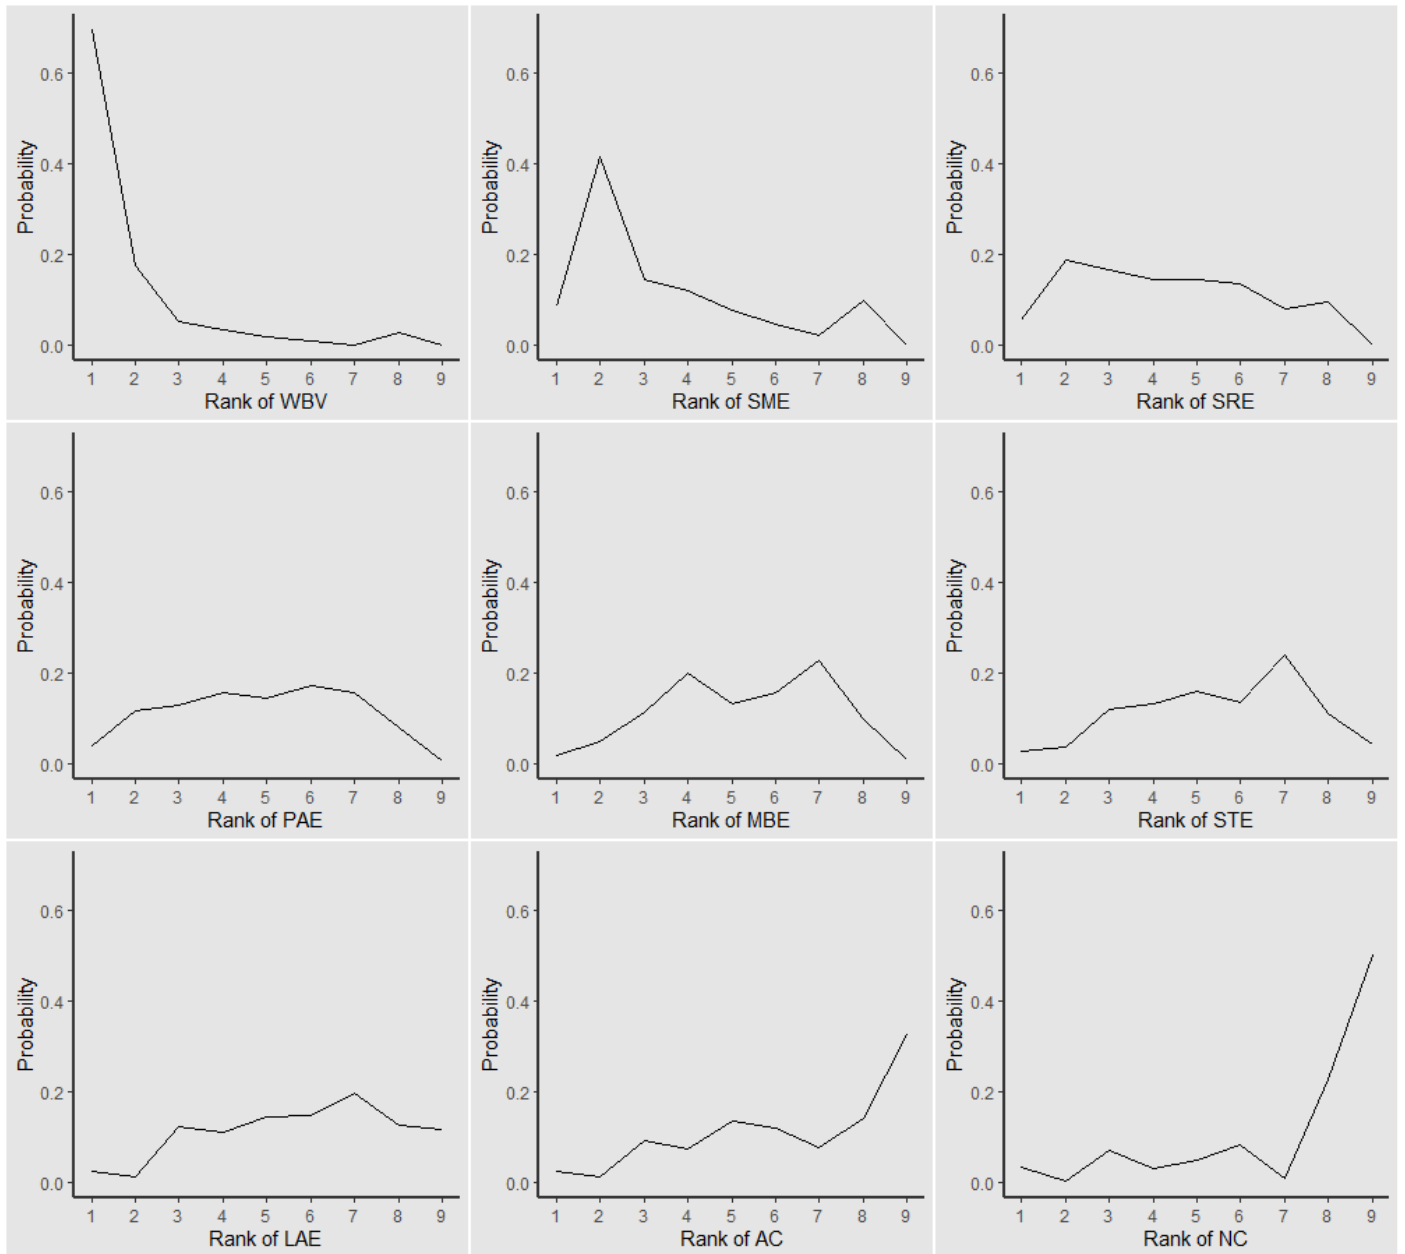

# Supplementary Figure 3. Netsplit Analysis of Inconsistency

## A. Quality of life

### Legend:

- comparison - Treatment comparison
- k - Number of studies providing direct evidence
- prop - Direct evidence proportion
- nma - Estimated treatment effect (SMD) in network meta-analysis
- direct - Estimated treatment effect (SMD) derived from direct evidence
- indir. - Estimated treatment effect (SMD) derived from indirect evidence
- Diff - Difference between direct and indirect treatment estimates
- z - z-value of test for disagreement (direct versus indirect)
- p-value - p-value of test for disagreement (direct versus indirect)

### Random effects model:

| comparison | k | prop | nma      | 95%-CI              | direct   | 95%-CI              | indir.   | 95%-CI              | Diff     | 95%-CI              | z     | p-value |
|------------|---|------|----------|---------------------|----------|---------------------|----------|---------------------|----------|---------------------|-------|---------|
| AC vs LAE  | 2 | 0.79 | 5.8590   | [ 2.0392; 9.6789]   | 5.9789   | [ 1.6764; 10.2815]  | 5.4129   | [-2.8867; 13.7126]  | 0.5660   | [-8.7826; 9.9146]   | 0.12  | 0.9055  |
| AC vs MBE  | 1 | 0.08 | 11.4884  | [ 6.2802; 16.6966]  | 18.0000  | [-0.5058; 36.5058]  | 10.9283  | [ 5.5006; 16.3559]  | 7.0717   | [-12.2136; 26.3571] | 0.72  | 0.4723  |
| AC vs NC   | 0 | 0    | -0.6334  | [-5.0406; 3.7739]   | .        | .                   | -0.6334  | [-5.0406; 3.7739]   | .        | .                   | .     | .       |
| AC vs PAE  | 0 | 0    | 5.8513   | [ 1.3790; 10.3235]  | .        | .                   | 5.8513   | [ 1.3790; 10.3235]  | .        | .                   | .     | .       |
| AC vs SME  | 0 | 0    | 2.4038   | [-2.6819; 7.4894]   | .        | .                   | 2.4038   | [-2.6819; 7.4894]   | .        | .                   | .     | .       |
| AC vs SRE  | 1 | 0.36 | 6.5577   | [ 1.7243; 11.3911]  | 4.9000   | [-3.1643; 12.9643]  | 7.4871   | [ 1.4490; 13.5251]  | -2.5871  | [-12.6613; 7.4872]  | -0.50 | 0.6147  |
| AC vs STE  | 0 | 0    | 3.1516   | [-1.4636; 7.7668]   | .        | .                   | 3.1516   | [-1.4636; 7.7668]   | .        | .                   | .     | .       |
| AC vs WBV  | 0 | 0    | 8.6011   | [ 2.0514; 15.1507]  | .        | .                   | 8.6011   | [ 2.0514; 15.1507]  | .        | .                   | .     | .       |
| LAE vs MBE | 2 | 0.41 | 5.6294   | [ 1.8088; 9.4500]   | 0.4578   | [-5.4923; 6.4079]   | 9.2575   | [ 4.2737; 14.2412]  | -8.7996  | [-16.5612; -1.0381] | -2.22 | 0.0263  |
| LAE vs NC  | 9 | 0.47 | -6.4924  | [-8.9766; -4.0082]  | -8.9069  | [-12.5422; -5.2717] | -4.3769  | [-7.7796; -0.9741]  | -4.5300  | [-9.5093; 0.4493]   | -1.78 | 0.0746  |
| LAE vs PAE | 5 | 0.69 | -0.0078  | [-2.4606; 2.4451]   | 1.7485   | [-1.1970; 4.6940]   | -3.9807  | [-8.4109; 0.4495]   | 5.7292   | [ 0.4092; 11.0492]  | 2.11  | 0.0348  |
| LAE vs SME | 1 | 0.06 | -3.4553  | [-7.0287; 0.1181]   | -15.7300 | [-30.0702; -1.3898] | -2.6426  | [-6.3324; 1.0472]   | -13.0874 | [-27.8947; 1.7199]  | -1.73 | 0.0832  |
| LAE vs SRE | 0 | 0    | 0.6987   | [-3.2450; 4.6423]   | .        | .                   | 0.6987   | [-3.2450; 4.6423]   | .        | .                   | .     | .       |
| LAE vs STE | 2 | 0.64 | -2.7075  | [-5.8547; 0.4397]   | -0.5715  | [-4.5145; 3.3715]   | -6.4572  | [-11.6815; -1.2329] | 5.8857   | [-0.6596; 12.4309]  | 1.76  | 0.0780  |
| LAE vs WBV | 0 | 0    | 2.7420   | [-2.7027; 8.1868]   | .        | .                   | 2.7420   | [-2.7027; 8.1868]   | .        | .                   | .     | .       |
| MBE vs NC  | 4 | 0.61 | -12.1218 | [-15.7929; -8.4506] | -12.9906 | [-17.6799; -8.3013] | -10.7461 | [-16.6465; -4.8458] | -2.2445  | [-9.7813; 5.2923]   | -0.58 | 0.5594  |
| MBE vs PAE | 1 | 0.14 | -5.6371  | [-9.7094; -1.5649]  | -7.0000  | [-18.0424; 4.0424]  | -5.4226  | [-9.8037; -1.0416]  | -1.5774  | [-13.4571; 10.3024] | -0.26 | 0.7947  |
| MBE vs SME | 0 | 0    | -9.0846  | [-13.6399; -4.5294] | .        | .                   | -9.0846  | [-13.6399; -4.5294] | .        | .                   | .     | .       |
| MBE vs SRE | 0 | 0    | -4.9307  | [-10.0292; 0.1678]  | .        | .                   | -4.9307  | [-10.0292; 0.1678]  | .        | .                   | .     | .       |
| MBE vs STE | 1 | 0.13 | -8.3368  | [-12.8914; -3.7823] | -14.0000 | [-26.4327; -1.5673] | -7.4590  | [-12.3538; -2.5642] | -6.5410  | [-19.9025; 6.8205]  | -0.96 | 0.3373  |
| MBE vs WBV | 0 | 0    | -2.8873  | [-8.9660; 3.1914]   | .        | .                   | -2.8873  | [-8.9660; 3.1914]   | .        | .                   | .     | .       |
| NC vs PAE  | 4 | 0.56 | 6.4846   | [ 3.8256; 9.1436]   | 4.0688   | [ 0.5146; 7.6229]   | 9.5560   | [ 5.5485; 13.5634]  | -5.4872  | [-10.8436; -0.1308] | -2.01 | 0.0447  |
| NC vs SME  | 4 | 0.87 | 3.0371   | [ 0.2005; 5.8737]   | 2.0172   | [-1.0216; 5.0559]   | 9.9457   | [ 2.0370; 17.8545]  | -7.9285  | [-16.4010; 0.5439]  | -1.83 | 0.0666  |
| NC vs SRE  | 4 | 0.33 | 7.1911   | [ 3.0906; 11.2915]  | 11.1742  | [ 4.0460; 18.3023]  | 5.2212   | [ 0.2084; 10.2340]  | 5.9530   | [-2.7613; 14.6673]  | 1.34  | 0.1806  |
| NC vs STE  | 1 | 0.04 | 3.7849   | [ 0.2608; 7.3090]   | 14.8700  | [-1.8714; 31.6114]  | 3.2710   | [-0.3339; 6.8758]   | 11.5990  | [-5.5261; 28.7242]  | 1.33  | 0.1843  |
| NC vs WBV  | 3 | 1.00 | 9.2344   | [ 4.3894; 14.0794]  | 9.2344   | [ 4.3894; 14.0794]  | .        | .                   | .        | .                   | .     | .       |
| PAE vs SME | 0 | 0    | -3.4475  | [-7.2239; 0.3289]   | .        | .                   | -3.4475  | [-7.2239; 0.3289]   | .        | .                   | .     | .       |
| PAE vs SRE | 0 | 0    | 0.7065   | [-3.7074; 5.1203]   | .        | .                   | 0.7065   | [-3.7074; 5.1203]   | .        | .                   | .     | .       |
| PAE vs STE | 0 | 0    | -2.6997  | [-6.4866; 1.0872]   | .        | .                   | -2.6997  | [-6.4866; 1.0872]   | .        | .                   | .     | .       |
| PAE vs WBV | 0 | 0    | 2.7498   | [-2.7769; 8.2765]   | .        | .                   | 2.7498   | [-2.7769; 8.2765]   | .        | .                   | .     | .       |
| SME vs SRE | 0 | 0    | 4.1540   | [-0.5937; 8.9016]   | .        | .                   | 4.1540   | [-0.5937; 8.9016]   | .        | .                   | .     | .       |
| SME vs STE | 2 | 0.25 | 0.7478   | [-3.4162; 4.9118]   | -11.1080 | [-19.4555; -2.7604] | 4.6751   | [-0.1293; 9.4795]   | -15.7831 | [-25.4145; -6.1517] | -3.21 | 0.0013  |
| SME vs WBV | 0 | 0    | 6.1973   | [ 0.5831; 11.8116]  | .        | .                   | 6.1973   | [ 0.5831; 11.8116]  | .        | .                   | .     | .       |
| SRE vs STE | 5 | 0.77 | -3.4061  | [-6.7441; -0.0681]  | -2.8947  | [-6.7050; 0.9157]   | -5.0940  | [-12.0158; 1.8278]  | 2.1994   | [-5.7019; 10.1006]  | 0.55  | 0.5854  |
| SRE vs WBV | 0 | 0    | 2.0434   | [-4.3038; 8.3906]   | .        | .                   | 2.0434   | [-4.3038; 8.3906]   | .        | .                   | .     | .       |
| STE vs WBV | 0 | 0    | 5.4495   | [-0.5416; 11.4406]  | .        | .                   | 5.4495   | [-0.5416; 11.4406]  | .        | .                   | .     | .       |

## B. Pain

### Legend:

- comparison - Treatment comparison
- k - Number of studies providing direct evidence
- prop - Direct evidence proportion
- nma - Estimated treatment effect (SMD) in network meta-analysis
- direct - Estimated treatment effect (SMD) derived from direct evidence
- indir. - Estimated treatment effect (SMD) derived from indirect evidence
- Diff - Difference between direct and indirect treatment estimates
- z - z-value of test for disagreement (direct versus indirect)
- p-value - p-value of test for disagreement (direct versus indirect)

### Random effects model:

| comparison   | k      | prop    | nma                | 95%-CI   | direct             | 95%-CI  | indir.             | 95%-CI   | Diff               | 95%-CI | z      | p-value |
|--------------|--------|---------|--------------------|----------|--------------------|---------|--------------------|----------|--------------------|--------|--------|---------|
| AC vs LAE 2  | 0.71   | 1.6248  | [ 0.3798; 2.8698]  | 0.7084   | [-0.7736; 2.1904]  | 3.8227  | [ 1.5275; 6.1178]  | -3.1143  | [-5.8463; -0.3823] | -2.23  | 0.0255 |         |
| AC vs MBE 1  | 0.35   | 2.4044  | [ 1.0807; 3.7281]  | 3.7000   | [ 1.4574; 5.9426]  | 1.7117  | [ 0.0718; 3.3515]  | 1.9883   | [-0.7899; 4.7665]  | 1.40   | 0.1607 |         |
| AC vs WBV 0  | 0      | 0.7511  | [-0.5879; 2.0902]  | .        | .                  | 0.7511  | [-0.5879; 2.0902]  | .        | .                  | .      | .      |         |
| AC vs PAE 0  | 0      | 0.2092  | [ 0.6332; 3.4253]  | .        | .                  | 0.2092  | [ 0.6332; 3.4253]  | .        | .                  | .      | .      |         |
| AC vs SME 0  | 0      | 2.5650  | [ 0.9341; 4.1960]  | .        | .                  | 2.5650  | [ 0.9341; 4.1960]  | .        | .                  | .      | .      |         |
| AC vs SRE 1  | 0.04   | 2.4841  | [ 0.7031; 4.2652]  | 14.8000  | [ 6.0167; 23.5833] | 1.9560  | [ 0.1371; 3.7749]  | 12.8440  | [ 3.8744; 21.8136] | 2.81   | 0.0050 |         |
| AC vs STE 0  | 0      | 1.4449  | [-0.1144; 3.0043]  | .        | .                  | 1.4449  | [-0.1144; 3.0043]  | .        | .                  | .      | .      |         |
| AC vs WBV 0  | 0      | 1.8736  | [ 0.0359; 3.7113]  | .        | .                  | 1.8736  | [ 0.0359; 3.7113]  | .        | .                  | .      | .      |         |
| LAE vs MBE 2 | 0.36   | 0.7796  | [ 0.0526; 1.5067]  | 0.4469   | [-0.7605; 1.6542]  | 0.9690  | [ 0.0583; 1.8796]  | -0.5221  | [-2.0343; 0.9901]  | -0.68  | 0.4986 |         |
| LAE vs NC 7  | 0.53   | -0.8736 | [-1.5334; -0.2139] | -0.5181  | [-1.4240; 0.3878]  | -1.2753 | [-2.2380; -0.3125] | 0.7572   | [-0.5648; 2.0792]  | 1.12   | 0.2616 |         |
| LAE vs PAE 6 | 0.71   | 0.4045  | [-0.2920; 1.1009]  | 0.2142   | [-0.6118; 1.0403]  | 0.8722  | [-0.4229; 2.1672]  | -0.6579  | [-2.1940; 0.8781]  | -0.84  | 0.4012 |         |
| LAE vs SME 1 | < 0.01 | 0.9403  | [-0.2016; 2.0821]  | -11.1300 | [-26.7075; 4.4475] | 1.0055  | [-0.1395; 2.1504]  | -12.1355 | [-27.7550; 3.4840] | -1.52  | 0.1278 |         |
| LAE vs SRE 0 | 0      | 0.8594  | [-0.5072; 2.2259]  | .        | .                  | 0.8594  | [-0.5072; 2.2259]  | .        | .                  | .      | .      |         |
| LAE vs STE 1 | 0.30   | -0.1798 | [-1.2188; 0.8592]  | -1.1800  | [-3.0846; 0.7246]  | 0.2440  | [-0.9958; 1.4837]  | -1.4240  | [-3.6965; 0.8486]  | -1.23  | 0.2194 |         |
| LAE vs WBV 0 | 0      | 0.2488  | [-1.1722; 1.6699]  | .        | .                  | 0.2488  | [-1.1722; 1.6699]  | .        | .                  | .      | .      |         |
| MBE vs NC 6  | 0.74   | -1.6533 | [-2.2576; -1.0490] | -1.5984  | [-2.3014; -0.8954] | -1.8086 | [-2.9914; -0.6258] | 0.2102   | [-1.1657; 1.5861]  | 0.30   | 0.7646 |         |
| MBE vs PAE 1 | 0.20   | -0.3752 | [-1.2359; 0.4856]  | 0.6000   | [-1.3072; 2.5072]  | -0.6246 | [-1.5892; 0.3400]  | 1.2246   | [-0.9126; 3.3619]  | 1.12   | 0.2614 |         |
| MBE vs SME 0 | 0      | 0.1606  | [-0.9562; 1.2774]  | .        | .                  | 0.1606  | [-0.9562; 1.2774]  | .        | .                  | .      | .      |         |
| MBE vs SRE 0 | 0      | 0.0797  | [-1.2682; 1.4277]  | .        | .                  | 0.0797  | [-1.2682; 1.4277]  | .        | .                  | .      | .      |         |
| MBE vs STE 1 | 0.31   | -0.9595 | [-1.9778; 0.0589]  | -1.9000  | [-3.7372; -0.0628] | -0.5423 | [-1.7658; 0.6812]  | -1.3577  | [-3.5650; 0.8496]  | -1.21  | 0.2280 |         |
| MBE vs WBV 0 | 0      | -0.5308 | [-1.9270; 0.8654]  | .        | .                  | -0.5308 | [-1.9270; 0.8654]  | .        | .                  | .      | .      |         |
| NC vs PAE 3  | 0.36   | 1.2781  | [ 0.4807; 2.0755]  | 1.2972   | [-0.0344; 2.6287]  | 1.2674  | [ 0.2718; 2.2631]  | 0.0297   | [-1.6329; 1.6924]  | 0.04   | 0.9720 |         |
| NC vs SME 3  | 0.69   | 1.8139  | [ 0.8200; 2.8078]  | 2.2686   | [ 1.0755; 3.4618]  | 0.7828  | [-1.0138; 2.5794]  | 1.4859   | [-0.6708; 3.6425]  | 1.35   | 0.1769 |         |
| NC vs SRE 2  | 0.62   | 1.7330  | [ 0.4701; 2.9959]  | 1.7724   | [ 0.1718; 3.3730]  | 1.6680  | [-0.3876; 3.7236]  | 0.1045   | [-2.5008; 2.7097]  | 0.08   | 0.9374 |         |
| NC vs STE 1  | 0.15   | 0.6938  | [-0.2678; 1.6555]  | 1.8000   | [-0.6658; 4.2658]  | 0.4954  | [-0.5490; 1.5397]  | 1.3046   | [-1.3733; 3.9825]  | 0.95   | 0.3396 |         |
| NC vs WBV 2  | 1.00   | 1.1225  | [-0.1362; 2.3811]  | 1.1225   | [-0.1362; 2.3811]  | .       | .                  | .        | .                  | .      | .      |         |
| PAE vs SME 0 | 0      | 0.5358  | [-0.7033; 1.7748]  | .        | .                  | 0.5358  | [-0.7033; 1.7748]  | .        | .                  | .      | .      |         |
| PAE vs SRE 0 | 0      | 0.4549  | [-0.9977; 1.9075]  | .        | .                  | 0.4549  | [-0.9977; 1.9075]  | .        | .                  | .      | .      |         |
| PAE vs STE 0 | 0      | -0.5843 | [-1.7471; 0.5785]  | .        | .                  | -0.5843 | [-1.7471; 0.5785]  | .        | .                  | .      | .      |         |
| PAE vs WBV 0 | 0      | -0.1557 | [-1.6456; 1.3343]  | .        | .                  | -0.1557 | [-1.6456; 1.3343]  | .        | .                  | .      | .      |         |
| SME vs SRE 0 | 0      | -0.0809 | [-1.5530; 1.3912]  | .        | .                  | -0.0809 | [-1.5530; 1.3912]  | .        | .                  | .      | .      |         |
| SME vs STE 2 | 0.57   | -1.1201 | [-2.1901; -0.0501] | -0.5811  | [-1.9947; 0.8326]  | -1.8431 | [-3.4803; -0.2058] | 1.2620   | [-0.9011; 3.4251]  | 1.14   | 0.2528 |         |
| SME vs WBV 0 | 0      | -0.6914 | [-2.2952; 0.9123]  | .        | .                  | -0.6914 | [-2.2952; 0.9123]  | .        | .                  | .      | .      |         |
| SRE vs STE 4 | 0.70   | -1.0392 | [-2.2714; 0.1930]  | -0.5936  | [-2.0671; 0.8800]  | -2.0753 | [-4.3222; 0.1715]  | 1.4818   | [-1.2052; 4.1687]  | 1.08   | 0.2798 |         |
| SRE vs WBV 0 | 0      | -0.6106 | [-2.3936; 1.1724]  | .        | .                  | -0.6106 | [-2.3936; 1.1724]  | .        | .                  | .      | .      |         |
| STE vs WBV 0 | 0      | 0.4287  | [-1.1553; 2.0126]  | .        | .                  | 0.4287  | [-1.1553; 2.0126]  | .        | .                  | .      | .      |         |



## C. Sleep

### Legend:

- comparison - Treatment comparison
- k - Number of studies providing direct evidence
- prop - Direct evidence proportion
- nma - Estimated treatment effect (SMD) in network meta-analysis
- direct - Estimated treatment effect (SMD) derived from direct evidence
- indir. - Estimated treatment effect (SMD) derived from indirect evidence
- Diff - Difference between direct and indirect treatment estimates
- z - z-value of test for disagreement (direct versus indirect)
- p-value - p-value of test for disagreement (direct versus indirect)

### Random effects model:

| comparison | k | prop | nma     | 95%-CI             | direct  | 95%-CI             | indir.  | 95%-CI             | Diff    | 95%-CI              | z     | p-value |
|------------|---|------|---------|--------------------|---------|--------------------|---------|--------------------|---------|---------------------|-------|---------|
| AC vs LAE  | 1 | 0.86 | 1.1355  | [-0.5923; 2.8634]  | 0.2000  | [-1.6620; 2.0620]  | 6.9337  | [ 2.2981; 11.5693] | -6.7337 | [-11.7293; -1.7381] | -2.64 | 0.0082  |
| AC vs MBE  | 1 | 0.32 | 0.7514  | [-1.5875; 3.0902]  | 5.3000  | [ 1.1942; 9.4058]  | -1.4337 | [-4.2794; 1.4120]  | 6.7337  | [ 1.7381; 11.7293]  | 2.64  | 0.0082  |
| AC vs NC   | 0 | 0    | 0.7689  | [-1.6263; 3.1641]  | .       | .                  | 0.7689  | [-1.6263; 3.1641]  | .       | .                   | .     | .       |
| AC vs PAE  | 0 | 0    | 1.4773  | [-0.9077; 3.8623]  | .       | .                  | 1.4773  | [-0.9077; 3.8623]  | .       | .                   | .     | .       |
| AC vs SME  | 0 | 0    | 2.5688  | [-0.4392; 5.5769]  | .       | .                  | 2.5688  | [-0.4392; 5.5769]  | .       | .                   | .     | .       |
| AC vs SRE  | 0 | 0    | 3.1514  | [ 0.3116; 5.9913]  | .       | .                  | 3.1514  | [ 0.3116; 5.9913]  | .       | .                   | .     | .       |
| AC vs STE  | 0 | 0    | 1.7161  | [-1.1974; 4.6296]  | .       | .                  | 1.7161  | [-1.1974; 4.6296]  | .       | .                   | .     | .       |
| AC vs WBV  | 0 | 0    | 7.7189  | [ 3.8205; 11.6172] | .       | .                  | 7.7189  | [ 3.8205; 11.6172] | .       | .                   | .     | .       |
| LAE vs MBE | 1 | 0.30 | -0.3841 | [-2.3262; 1.5579]  | -3.7000 | [-7.2351; -0.1649] | 1.0491  | [-1.2751; 3.3733]  | -4.7491 | [-8.9798; -0.5184]  | -2.20 | 0.0278  |
| LAE vs NC  | 2 | 0.09 | -0.3666 | [-2.3470; 1.6138]  | -0.1801 | [-6.7193; 6.3592]  | -0.3855 | [-2.4635; 1.6925]  | 0.2054  | [-6.6561; 7.0669]   | 0.06  | 0.9532  |
| LAE vs PAE | 1 | 0.61 | 0.3418  | [-1.5465; 2.2302]  | 0.2900  | [-2.1288; 2.7088]  | 0.4227  | [-2.5992; 3.4445]  | -0.1327 | [-4.0033; 3.7380]   | -0.07 | 0.9464  |
| LAE vs SME | 0 | 0    | 1.4333  | [-1.2562; 4.1228]  | .       | .                  | 1.4333  | [-1.2562; 4.1228]  | .       | .                   | .     | .       |
| LAE vs SRE | 0 | 0    | 2.0159  | [-0.4841; 4.5159]  | .       | .                  | 2.0159  | [-0.4841; 4.5159]  | .       | .                   | .     | .       |
| LAE vs STE | 0 | 0    | 0.5805  | [-2.0028; 3.1639]  | .       | .                  | 0.5805  | [-2.0028; 3.1639]  | .       | .                   | .     | .       |
| LAE vs WBV | 0 | 0    | 6.5834  | [ 2.9252; 10.2415] | .       | .                  | 6.5834  | [ 2.9252; 10.2415] | .       | .                   | .     | .       |
| MBE vs NC  | 5 | 0.89 | 0.0175  | [-0.8943; 0.9293]  | 0.0576  | [-0.9072; 1.0223]  | -0.3176 | [-3.1084; 2.4732]  | 0.3751  | [-2.5777; 3.3280]   | 0.25  | 0.8034  |
| MBE vs PAE | 1 | 0.27 | 0.7260  | [-0.7833; 2.2352]  | 0.4000  | [-2.5085; 3.3085]  | 0.8461  | [-0.9195; 2.6116]  | -0.4461 | [-3.8485; 2.9564]   | -0.26 | 0.7972  |
| MBE vs SME | 0 | 0    | 1.8175  | [-0.2180; 3.8529]  | .       | .                  | 1.8175  | [-0.2180; 3.8529]  | .       | .                   | .     | .       |
| MBE vs SRE | 0 | 0    | 2.4001  | [ 0.6226; 4.1775]  | .       | .                  | 2.4001  | [ 0.6226; 4.1775]  | .       | .                   | .     | .       |
| MBE vs STE | 0 | 0    | 0.9647  | [-0.9282; 2.8576]  | .       | .                  | 0.9647  | [-0.9282; 2.8576]  | .       | .                   | .     | .       |
| MBE vs WBV | 0 | 0    | 6.9675  | [ 3.7595; 10.1756] | .       | .                  | 6.9675  | [ 3.7595; 10.1756] | .       | .                   | .     | .       |
| NC vs PAE  | 2 | 0.65 | 0.7084  | [-0.7225; 2.1394]  | 0.8580  | [-0.9184; 2.6344]  | 0.4321  | [-1.9830; 2.8471]  | 0.4259  | [-2.5721; 3.4239]   | 0.28  | 0.7807  |
| NC vs SME  | 1 | 0.73 | 1.8000  | [-0.0198; 3.6197]  | 1.0300  | [-1.0965; 3.1565]  | 3.9064  | [ 0.3891; 7.4237]  | -2.8764 | [-6.9865; 1.2337]   | -1.37 | 0.1702  |
| NC vs SRE  | 3 | 0.85 | 2.3826  | [ 0.8568; 3.9083]  | 2.5436  | [ 0.8922; 4.1949]  | 1.4430  | [-2.5461; 5.4320]  | 1.1006  | [-3.2167; 5.4179]   | 0.50  | 0.6173  |
| NC vs STE  | 1 | 0.52 | 0.9472  | [-0.7116; 2.6060]  | 1.8500  | [-0.4465; 4.1465]  | -0.0378 | [-2.4364; 2.3609]  | 1.8878  | [-1.4330; 5.2085]   | 1.11  | 0.2652  |
| NC vs WBV  | 1 | 1.00 | 6.9500  | [ 3.8743; 10.0257] | 6.9500  | [ 3.8743; 10.0257] | .       | .                  | .       | .                   | .     | .       |
| PAE vs SME | 0 | 0    | 1.0915  | [-1.2235; 3.4065]  | .       | .                  | 1.0915  | [-1.2235; 3.4065]  | .       | .                   | .     | .       |
| PAE vs SRE | 0 | 0    | 1.6741  | [-0.4177; 3.7659]  | .       | .                  | 1.6741  | [-0.4177; 3.7659]  | .       | .                   | .     | .       |
| PAE vs STE | 0 | 0    | 0.2387  | [-1.9520; 2.4295]  | .       | .                  | 0.2387  | [-1.9520; 2.4295]  | .       | .                   | .     | .       |
| PAE vs WBV | 0 | 0    | 6.2416  | [ 2.8492; 9.6339]  | .       | .                  | 6.2416  | [ 2.8492; 9.6339]  | .       | .                   | .     | .       |
| SME vs SRE | 0 | 0    | 0.5826  | [-1.5897; 2.7549]  | .       | .                  | 0.5826  | [-1.5897; 2.7549]  | .       | .                   | .     | .       |
| SME vs STE | 1 | 0.47 | -0.8528 | [-2.9047; 1.1992]  | -2.3700 | [-5.3551; 0.6151]  | 0.5064  | [-2.3189; 3.3317]  | -2.8764 | [-6.9865; 1.2337]   | -1.37 | 0.1702  |
| SME vs WBV | 0 | 0    | 5.1500  | [ 1.5763; 8.7238]  | .       | .                  | 5.1500  | [ 1.5763; 8.7238]  | .       | .                   | .     | .       |
| SRE vs STE | 2 | 0.84 | -1.4354 | [-2.9667; 0.0960]  | -1.1952 | [-2.8648; 0.4743]  | -2.7082 | [-6.5519; 1.1355]  | 1.5129  | [-2.6777; 5.7036]   | 0.71  | 0.4792  |
| SRE vs WBV | 0 | 0    | 4.5674  | [ 1.1341; 8.0008]  | .       | .                  | 4.5674  | [ 1.1341; 8.0008]  | .       | .                   | .     | .       |
| STE vs WBV | 0 | 0    | 6.0028  | [ 2.5083; 9.4974]  | .       | .                  | 6.0028  | [ 2.5083; 9.4974]  | .       | .                   | .     | .       |

## D. Anxiety

### Legend:

- comparison - Treatment comparison
- k - Number of studies providing direct evidence
- prop - Direct evidence proportion
- nma - Estimated treatment effect (SMD) in network meta-analysis
- direct - Estimated treatment effect (SMD) derived from direct evidence
- indir. - Estimated treatment effect (SMD) derived from indirect evidence
- Diff - Difference between direct and indirect treatment estimates
- z - z-value of test for disagreement (direct versus indirect)
- p-value - p-value of test for disagreement (direct versus indirect)

### Random effects model:

| comparison | k | prop | nma     | 95%-CI             | direct  | 95%-CI             | indir.  | 95%-CI             | Diff    | 95%-CI            | z     | p-value |
|------------|---|------|---------|--------------------|---------|--------------------|---------|--------------------|---------|-------------------|-------|---------|
| AC vs LAE  | 1 | 0.82 | 0.3955  | [-1.4617; 2.2527]  | 0.6000  | [-1.4527; 2.6527]  | -0.5272 | [-4.8874; 3.8329]  | 1.1272  | [-3.6919; 5.9464] | 0.46  | 0.6466  |
| AC vs MBE  | 1 | 0.33 | -0.3449 | [-2.6110; 1.9213]  | -1.1000 | [-5.0444; 2.8444]  | 0.0272  | [-2.7415; 2.7960]  | -1.1272 | [-5.9464; 3.6919] | -0.46 | 0.6466  |
| AC vs NC   | 0 | 0    | -2.4770 | [-4.7977; -0.1563] | .       | .                  | -2.4770 | [-4.7977; -0.1563] | .       | .                 | .     | .       |
| AC vs PAE  | 0 | 0    | 2.3498  | [-0.7138; 5.4135]  | .       | .                  | 2.3498  | [-0.7138; 5.4135]  | .       | .                 | .     | .       |
| AC vs SME  | 0 | 0    | -0.5766 | [-3.4579; 2.3046]  | .       | .                  | -0.5766 | [-3.4579; 2.3046]  | .       | .                 | .     | .       |
| AC vs SRE  | 0 | 0    | -1.8332 | [-5.3431; 1.6768]  | .       | .                  | -1.8332 | [-5.3431; 1.6768]  | .       | .                 | .     | .       |
| AC vs STE  | 0 | 0    | -2.0667 | [-4.9347; 0.8013]  | .       | .                  | -2.0667 | [-4.9347; 0.8013]  | .       | .                 | .     | .       |
| LAE vs MBE | 1 | 0.42 | -0.7403 | [-2.4547; 0.9741]  | 0.1000  | [-2.5405; 2.7405]  | -1.3527 | [-3.6069; 0.9014]  | 1.4527  | [-2.0191; 4.9246] | 0.82  | 0.4121  |
| LAE vs NC  | 3 | 0.47 | -2.8725 | [-4.5076; -1.2374] | -2.6028 | [-4.9874; -0.2181] | -3.1119 | [-5.3582; -0.8656] | 0.5091  | [-2.7669; 3.7852] | 0.30  | 0.7607  |
| LAE vs PAE | 1 | 0.68 | 1.9544  | [-0.5355; 4.4442]  | 1.7000  | [-1.3177; 4.7177]  | 2.4968  | [-1.9102; 6.9038]  | -0.7968 | [-6.1380; 4.5443] | -0.29 | 0.7700  |
| LAE vs SME | 0 | 0    | -0.9721 | [-3.3278; 1.3836]  | .       | .                  | -0.9721 | [-3.3278; 1.3836]  | .       | .                 | .     | .       |
| LAE vs SRE | 0 | 0    | -2.2287 | [-5.3184; 0.8611]  | .       | .                  | -2.2287 | [-5.3184; 0.8611]  | .       | .                 | .     | .       |
| LAE vs STE | 1 | 0.21 | -2.4622 | [-4.7896; -0.1349] | -4.8300 | [-9.9172; 0.2572]  | -1.8355 | [-4.4528; 0.7818]  | -2.9945 | [-8.7155; 2.7265] | -1.03 | 0.3049  |
| MBE vs NC  | 3 | 0.77 | -2.1322 | [-3.6000; -0.6644] | -1.9295 | [-3.6074; -0.2516] | -2.7929 | [-5.8223; 0.2366]  | 0.8634  | [-2.5998; 4.3265] | 0.49  | 0.6251  |
| MBE vs PAE | 0 | 0    | 2.6947  | [-0.1170; 5.5064]  | .       | .                  | 2.6947  | [-0.1170; 5.5064]  | .       | .                 | .     | .       |
| MBE vs SME | 0 | 0    | -0.2318 | [-2.5162; 2.0527]  | .       | .                  | -0.2318 | [-2.5162; 2.0527]  | .       | .                 | .     | .       |
| MBE vs SRE | 0 | 0    | -1.4883 | [-4.5405; 1.5638]  | .       | .                  | -1.4883 | [-4.5405; 1.5638]  | .       | .                 | .     | .       |
| MBE vs STE | 0 | 0    | -1.7219 | [-4.0353; 0.5915]  | .       | .                  | -1.7219 | [-4.0353; 0.5915]  | .       | .                 | .     | .       |
| NC vs PAE  | 2 | 0.42 | 4.8269  | [ 2.1874; 7.4663]  | 5.2860  | [ 1.2319; 9.3400]  | 4.4891  | [ 1.0117; 7.9665]  | 0.7968  | [-4.5443; 6.1380] | 0.29  | 0.7700  |
| NC vs SME  | 2 | 0.72 | 1.9004  | [ 0.1208; 3.6800]  | 1.7872  | [-0.3099; 3.8843]  | 2.1916  | [-1.1720; 5.5553]  | -0.4044 | [-4.3683; 3.5594] | -0.20 | 0.8415  |
| NC vs SRE  | 2 | 0.70 | 0.6439  | [-2.0614; 3.3492]  | 1.8071  | [-1.4241; 5.0383]  | -2.0830 | [-7.0303; 2.8642]  | 3.8901  | [-2.0188; 9.7991] | 1.29  | 0.1969  |
| NC vs STE  | 1 | 0.50 | 0.4103  | [-1.4458; 2.2665]  | 0.9600  | [-1.6705; 3.5905]  | -0.1348 | [-2.7544; 2.4847]  | 1.0948  | [-2.6175; 4.8072] | 0.58  | 0.5632  |
| PAE vs SME | 0 | 0    | -2.9265 | [-6.0802; 0.2273]  | .       | .                  | -2.9265 | [-6.0802; 0.2273]  | .       | .                 | .     | .       |
| PAE vs SRE | 0 | 0    | -4.1830 | [-7.9245; -0.4416] | .       | .                  | -4.1830 | [-7.9245; -0.4416] | .       | .                 | .     | .       |
| PAE vs STE | 0 | 0    | -4.4166 | [-7.5725; -1.2606] | .       | .                  | -4.4166 | [-7.5725; -1.2606] | .       | .                 | .     | .       |
| SME vs SRE | 0 | 0    | -1.2565 | [-4.2016; 1.6885]  | .       | .                  | -1.2565 | [-4.2016; 1.6885]  | .       | .                 | .     | .       |
| SME vs STE | 1 | 0.60 | -1.4901 | [-3.4281; 0.4479]  | -1.6500 | [-4.1424; 0.8424]  | -1.2456 | [-4.3278; 1.8367]  | -0.4044 | [-4.3683; 3.5594] | -0.20 | 0.8415  |
| SRE vs STE | 3 | 0.88 | -0.2336 | [-2.7618; 2.2947]  | -0.1543 | [-2.8430; 2.5344]  | -0.8390 | [-8.2682; 6.5902]  | 0.6847  | [-7.2160; 8.5855] | 0.17  | 0.8651  |

## E. Depression

### Legend:

- comparison - Treatment comparison
- k - Number of studies providing direct evidence
- prop - Direct evidence proportion
- nma - Estimated treatment effect (SMD) in network meta-analysis
- direct - Estimated treatment effect (SMD) derived from direct evidence
- indir. - Estimated treatment effect (SMD) derived from indirect evidence
- Diff - Difference between direct and indirect treatment estimates
- z - z-value of test for disagreement (direct versus indirect)
- p-value - p-value of test for disagreement (direct versus indirect)

### Random effects model:

| comparison | k | prop | nma     | 95%-CI             | direct  | 95%-CI             | indir.  | 95%-CI              | Diff    | 95%-CI              | z     | p-value |
|------------|---|------|---------|--------------------|---------|--------------------|---------|---------------------|---------|---------------------|-------|---------|
| AC vs LAE  | 1 | 0.60 | 0.8475  | [-5.9975; 7.6925]  | -0.1000 | [-8.9415; 8.7415]  | 2.2650  | [-8.5493; 13.0793]  | -2.3650 | [-16.3336; 11.6036] | -0.33 | 0.7400  |
| AC vs MBE  | 1 | 0.54 | 1.2005  | [-5.7666; 8.1675]  | 2.3000  | [-7.2245; 11.8245] | -0.0650 | [-10.2829; 10.1529] | 2.3650  | [-11.6036; 16.3336] | 0.33  | 0.7400  |
| AC vs NC   | 0 | 0    | -2.0019 | [-9.1055; 5.1017]  | .       | .                  | -2.0019 | [-9.1055; 5.1017]   | .       | .                   | .     | .       |
| AC vs PAE  | 0 | 0    | 1.4218  | [-6.3897; 9.2332]  | .       | .                  | 1.4218  | [-6.3897; 9.2332]   | .       | .                   | .     | .       |
| AC vs SME  | 0 | 0    | 4.3243  | [-3.8735; 12.5222] | .       | .                  | 4.3243  | [-3.8735; 12.5222]  | .       | .                   | .     | .       |
| AC vs SRE  | 0 | 0    | 1.6832  | [-7.3208; 10.6872] | .       | .                  | 1.6832  | [-7.3208; 10.6872]  | .       | .                   | .     | .       |
| AC vs STE  | 0 | 0    | 0.9726  | [-7.4181; 9.3634]  | .       | .                  | 0.9726  | [-7.4181; 9.3634]   | .       | .                   | .     | .       |
| AC vs WBV  | 0 | 0    | 8.4381  | [-5.1293; 22.0054] | .       | .                  | 8.4381  | [-5.1293; 22.0054]  | .       | .                   | .     | .       |
| LAE vs MBE | 1 | 0.28 | 0.3530  | [-4.4121; 5.1181]  | 1.2000  | [-7.8389; 10.2389] | 0.0269  | [-5.5807; 5.6346]   | 1.1731  | [-9.4640; 11.8101]  | 0.22  | 0.8289  |
| LAE vs NC  | 9 | 0.66 | -2.8494 | [-5.9006; 0.2017]  | -4.0905 | [-7.8386; -0.3423] | -0.4115 | [-5.6648; 4.8418]   | -3.6790 | [-10.1323; 2.7744]  | -1.12 | 0.2638  |
| LAE vs PAE | 4 | 0.71 | 0.5743  | [-3.4344; 4.5829]  | 0.8553  | [-3.8955; 5.6060]  | -0.1204 | [-7.5899; 7.3491]   | 0.9757  | [-7.8766; 9.8280]   | 0.22  | 0.8290  |
| LAE vs SME | 1 | 0.31 | 3.4768  | [-1.4808; 8.4345]  | 7.9100  | [-0.9881; 16.8081] | 1.4812  | [-4.4889; 7.4513]   | 6.4288  | [-4.2866; 17.1441]  | 1.18  | 0.2396  |
| LAE vs SRE | 0 | 0    | 0.8357  | [-5.3868; 7.0582]  | .       | .                  | 0.8357  | [-5.3868; 7.0582]   | .       | .                   | .     | .       |
| LAE vs STE | 1 | 0.30 | 0.1251  | [-5.1102; 5.3604]  | -0.7400 | [-10.3578; 8.8778] | 0.4894  | [-5.7515; 6.7303]   | -1.2294 | [-12.6946; 10.2358] | -0.21 | 0.8335  |
| LAE vs WBV | 0 | 0    | 7.5906  | [-4.3644; 19.5456] | .       | .                  | 7.5906  | [-4.3644; 19.5456]  | .       | .                   | .     | .       |
| MBE vs NC  | 3 | 0.70 | -3.2024 | [-7.6404; 1.2357]  | -2.5692 | [-7.8755; 2.7372]  | -4.6764 | [-12.7724; 3.4196]  | 2.1072  | [-7.5728; 11.7873]  | 0.43  | 0.6696  |
| MBE vs PAE | 0 | 0    | 0.2213  | [-5.6660; 6.1086]  | .       | .                  | 0.2213  | [-5.6660; 6.1086]   | .       | .                   | .     | .       |
| MBE vs SME | 0 | 0    | 3.1239  | [-3.0527; 9.3005]  | .       | .                  | 3.1239  | [-3.0527; 9.3005]   | .       | .                   | .     | .       |
| MBE vs SRE | 0 | 0    | 0.4827  | [-6.7076; 7.6730]  | .       | .                  | 0.4827  | [-6.7076; 7.6730]   | .       | .                   | .     | .       |
| MBE vs STE | 0 | 0    | -0.2278 | [-6.6916; 6.2359]  | .       | .                  | -0.2278 | [-6.6916; 6.2359]   | .       | .                   | .     | .       |
| MBE vs WBV | 0 | 0    | 7.2376  | [-5.1442; 19.6194] | .       | .                  | 7.2376  | [-5.1442; 19.6194]  | .       | .                   | .     | .       |
| NC vs PAE  | 2 | 0.43 | 3.4237  | [-0.9534; 7.8008]  | 2.8635  | [-3.8445; 9.5714]  | 3.8391  | [-1.9373; 9.6155]   | -0.9757 | [-9.8280; 7.8766]   | -0.22 | 0.8290  |
| NC vs SME  | 3 | 0.69 | 6.3263  | [1.8448; 10.8077]  | 7.4002  | [2.0005; 12.7999]  | 3.9493  | [-4.0842; 11.9827]  | 3.4509  | [-6.2286; 13.1304]  | 0.70  | 0.4847  |
| NC vs SRE  | 2 | 0.63 | 3.6851  | [-2.0881; 9.4584]  | 3.5651  | [-3.6888; 10.8190] | 3.8925  | [-5.6429; 13.4279]  | -0.3274 | [-12.3083; 11.6536] | -0.05 | 0.9573  |
| NC vs STE  | 1 | 0.29 | 2.9745  | [-1.9368; 7.8859]  | 0.9500  | [-8.1924; 10.0924] | 3.7958  | [-2.0271; 9.6188]   | -2.8458 | [-13.6851; 7.9934]  | -0.51 | 0.6068  |
| NC vs WBV  | 1 | 1.00 | 10.4400 | [-1.1191; 21.9991] | 10.4400 | [-1.1191; 21.9991] | .       | .                   | .       | .                   | .     | .       |
| PAE vs SME | 0 | 0    | 2.9026  | [-3.1004; 8.9056]  | .       | .                  | 2.9026  | [-3.1004; 8.9056]   | .       | .                   | .     | .       |
| PAE vs SRE | 0 | 0    | 0.2614  | [-6.8011; 7.3239]  | .       | .                  | 0.2614  | [-6.8011; 7.3239]   | .       | .                   | .     | .       |
| PAE vs STE | 0 | 0    | -0.4491 | [-6.7157; 5.8174]  | .       | .                  | -0.4491 | [-6.7157; 5.8174]   | .       | .                   | .     | .       |
| PAE vs WBV | 0 | 0    | 7.0163  | [-5.3438; 19.3764] | .       | .                  | 7.0163  | [-5.3438; 19.3764]  | .       | .                   | .     | .       |
| SME vs SRE | 0 | 0    | -2.6412 | [-9.0593; 3.7770]  | .       | .                  | -2.6412 | [-9.0593; 3.7770]   | .       | .                   | .     | .       |
| SME vs STE | 2 | 0.58 | -3.3517 | [-8.3945; 1.6911]  | -1.9894 | [-8.6013; 4.6225]  | -5.2461 | [-13.0429; 2.5508]  | 3.2567  | [-6.9662; 13.4796]  | 0.62  | 0.5324  |
| SME vs WBV | 0 | 0    | 4.1137  | [-8.2837; 16.5111] | .       | .                  | 4.1137  | [-8.2837; 16.5111]  | .       | .                   | .     | .       |
| SRE vs STE | 3 | 0.84 | -0.7106 | [-5.8143; 4.3932]  | -1.2154 | [-6.7949; 4.3640]  | 1.8774  | [-10.7547; 14.5096] | -3.0929 | [-16.9023; 10.7166] | -0.44 | 0.6607  |
| SRE vs WBV | 0 | 0    | 6.7549  | [-6.1657; 19.6755] | .       | .                  | 6.7549  | [-6.1657; 19.6755]  | .       | .                   | .     | .       |
| STE vs WBV | 0 | 0    | 7.4655  | [-5.0938; 20.0247] | .       | .                  | 7.4655  | [-5.0938; 20.0247]  | .       | .                   | .     | .       |



# Supplementary Figure 5. Comparison-Adjusted Funnel Plot

## A. Pain

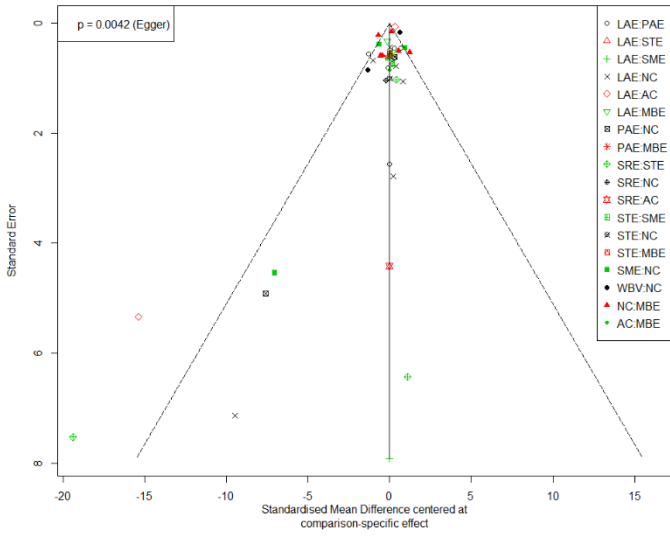

## B. Sleep

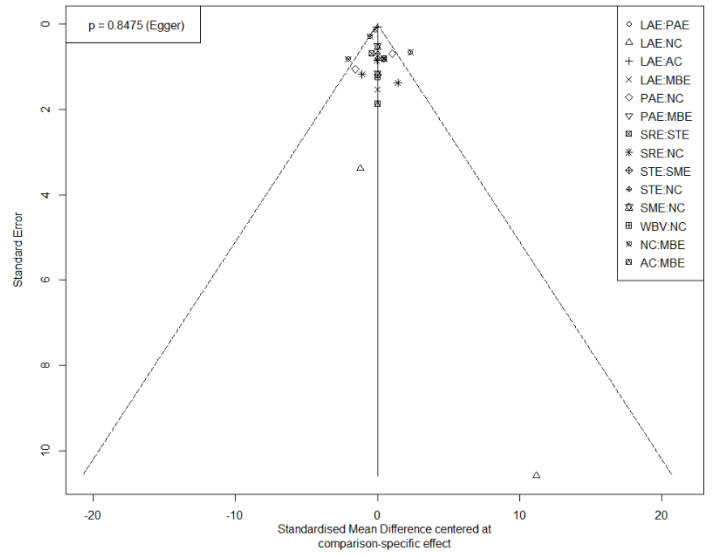

## C. Anxiety

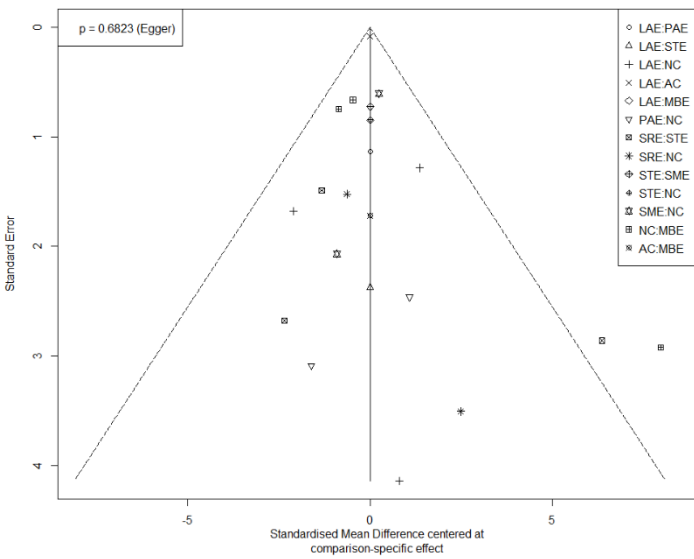

## D. Depression

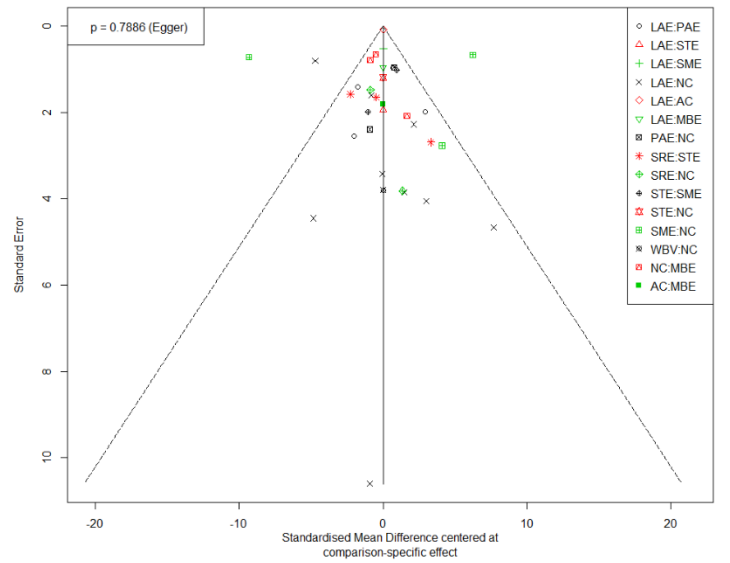

## Supplementary Appendix 1. PRISMA NMA checklist

| Section/Topic             | Item | Checklist Item                                                                                                                                                                                                                                                                                                                                                                                                                                                                                                                                                                                                                                                                                                                                      | Reported on Page                  |
|---------------------------|------|-----------------------------------------------------------------------------------------------------------------------------------------------------------------------------------------------------------------------------------------------------------------------------------------------------------------------------------------------------------------------------------------------------------------------------------------------------------------------------------------------------------------------------------------------------------------------------------------------------------------------------------------------------------------------------------------------------------------------------------------------------|-----------------------------------|
| <b>TITLE</b>              |      |                                                                                                                                                                                                                                                                                                                                                                                                                                                                                                                                                                                                                                                                                                                                                     |                                   |
| Title                     | 1    | Identify the report as a systematic review <i>incorporating a network meta-analysis (or related form of meta-analysis)</i> .                                                                                                                                                                                                                                                                                                                                                                                                                                                                                                                                                                                                                        | 1                                 |
| <b>ABSTRACT</b>           |      |                                                                                                                                                                                                                                                                                                                                                                                                                                                                                                                                                                                                                                                                                                                                                     |                                   |
| Structured summary        | 2    | Provide a structured summary including, as applicable:<br>Background: main objectives<br>Methods: data sources; study eligibility criteria, participants, and interventions; study appraisal; and <i>synthesis methods, such as network meta-analysis</i> .<br>Results: number of studies and participants identified; summary estimates with corresponding confidence/credible intervals; <i>treatment rankings may also be discussed. Authors may choose to summarize pairwise comparisons against a chosen treatment included in their analyze for brevity.</i><br>Discussion/Conclusions: limitations; conclusions and implications of findings.<br>Other: primary source of funding; systematic review registration number with registry name. | 1                                 |
| <b>INTRODUCTION</b>       |      |                                                                                                                                                                                                                                                                                                                                                                                                                                                                                                                                                                                                                                                                                                                                                     |                                   |
| Rationale                 | 3    | Describe the rationale for the review in the context of what is already known, <i>including mention of why a network meta-analysis has been conducted</i> .                                                                                                                                                                                                                                                                                                                                                                                                                                                                                                                                                                                         | 2                                 |
| Objectives                | 4    | Provide an explicit statement of questions being addressed, with reference to participants, interventions, comparisons, outcomes, and study design (PICOS).                                                                                                                                                                                                                                                                                                                                                                                                                                                                                                                                                                                         | 3-4                               |
| <b>METHODS</b>            |      |                                                                                                                                                                                                                                                                                                                                                                                                                                                                                                                                                                                                                                                                                                                                                     |                                   |
| Protocol and registration | 5    | Indicate whether a review protocol exists and if and where it can be accessed (e.g., Web address); and, if available, provide registration information, including registration number.                                                                                                                                                                                                                                                                                                                                                                                                                                                                                                                                                              | 2                                 |
| Eligibility criteria      | 6    | Specify study characteristics (e.g., PICOS, length of follow-up) and report characteristics (e.g., years considered, language, publication status) used as criteria for eligibility, giving rationale. <i>Clearly describe eligible treatments included in the treatment network, and note whether any have been clustered or merged into the same node (with justification)</i> .                                                                                                                                                                                                                                                                                                                                                                  | 3                                 |
| Information sources       | 7    | Describe all information sources (e.g., databases with dates of coverage, contact with study authors to identify additional studies) in the search and date last searched.                                                                                                                                                                                                                                                                                                                                                                                                                                                                                                                                                                          | 3,<br>Supplementary<br>Appendix 1 |
| Search                    | 8    | Present full electronic search strategy for at least one database, including any limits used, such that it could be repeated.                                                                                                                                                                                                                                                                                                                                                                                                                                                                                                                                                                                                                       | 3,<br>Supplementary<br>Table 1    |
| Study selection           | 9    | State the process for selecting studies (i.e., screening, eligibility, included in systematic review, and, if applicable, included in the meta-analysis).                                                                                                                                                                                                                                                                                                                                                                                                                                                                                                                                                                                           | 3,<br>Supplementary<br>Table 2,   |

|                                        |    |                                                                                                                                                                                                                                                                                                                                                                      |                       |
|----------------------------------------|----|----------------------------------------------------------------------------------------------------------------------------------------------------------------------------------------------------------------------------------------------------------------------------------------------------------------------------------------------------------------------|-----------------------|
|                                        |    |                                                                                                                                                                                                                                                                                                                                                                      | Supplementary Table 3 |
| Data collection process                | 10 | Describe method of data extraction from reports (e.g., piloted forms, independently, in duplicate) and any processes for obtaining and confirming data from investigators.                                                                                                                                                                                           | 4                     |
| Data items                             | 11 | List and define all variables for which data were sought (e.g., PICOS, funding sources) and any assumptions and simplifications made.                                                                                                                                                                                                                                | 4                     |
| Geometry of the network                | S1 | Describe methods used to explore the geometry of the treatment network under study and potential biases related to it. This should include how the evidence base has been graphically summarized for presentation, and what characteristics were compiled and used to describe the evidence base to readers.                                                         | 4-5                   |
| Risk of bias within individual studies | 12 | Describe methods used for assessing risk of bias of individual studies (including specification of whether this was done at the study or outcome level), and how this information is to be used in any data synthesis.                                                                                                                                               | 4                     |
| Summary measures                       | 13 | State the principal summary measures (e.g., risk ratio, difference in means). <i>Also describe the use of additional summary measures assessed, such as treatment rankings and surface under the cumulative ranking curve (SUCRA) values, as well as modified approaches used to present summary findings from meta-analyze.</i>                                     | 4                     |
| Planned methods of analysis            | 14 | Describe the methods of handling data and combining results of studies for each network meta-analysis. This should include, but not be limited to:<br><i>Handling of multi-arm trials;</i><br><i>Selection of variance structure;</i><br><i>Selection of prior distributions in Bayesian analyze; and</i><br><i>Assessment of model fit.</i>                         | 4-5                   |
| Assessment of Inconsistency            | S2 | Describe the statistical methods used to evaluate the agreement of direct and indirect evidence in the treatment network(s) studied. Describe efforts taken to address its presence when found.                                                                                                                                                                      | 5                     |
| Assessment of Inconsistency            | 15 | Specify any assessment of risk of bias that may affect the cumulative evidence (e.g., publication bias, selective reporting within studies).                                                                                                                                                                                                                         | 5                     |
| Additional analyze                     | 16 | Describe methods of additional analyze if done, indicating which were pre-specified. This may include, but not be limited to, the following:<br>Sensitivity or subgroup analyze;<br>Meta-regression analyze;<br><i>Alternative formulations of the treatment network; and</i><br><i>Use of alternative prior distributions for Bayesian analyze (if applicable).</i> | NA                    |
| <b>RESULTS</b>                         |    |                                                                                                                                                                                                                                                                                                                                                                      |                       |
| Study selection                        | 17 | Give numbers of studies screened, assessed for eligibility, and included in the review, with reasons for exclusions at each stage, ideally with a flow diagram.                                                                                                                                                                                                      | 5, Figure 1           |
| Presentation of network structure      | S3 | Provide a network graph of the included studies to enable                                                                                                                                                                                                                                                                                                            | Figure 2,             |

|                               |    |                                                                                                                                                                                                                                                                                                                                                                                                                                                         |                                                                               |
|-------------------------------|----|---------------------------------------------------------------------------------------------------------------------------------------------------------------------------------------------------------------------------------------------------------------------------------------------------------------------------------------------------------------------------------------------------------------------------------------------------------|-------------------------------------------------------------------------------|
|                               |    | visualization of the geometry of the treatment network.                                                                                                                                                                                                                                                                                                                                                                                                 | Supplementary Figure 2                                                        |
| Summary of network geometry   | S4 | Provide a brief overview of characteristics of the treatment network. This may include commentary on the abundance of trials and randomized patients for the different interventions and pairwise comparisons in the network, gaps of evidence in the treatment network, and potential biases reflected by the network structure.                                                                                                                       | 6-7                                                                           |
| Study characteristics         | 18 | For each study, present characteristics for which data were extracted (e.g., study size, PICOS, follow-up period) and provide the citations.                                                                                                                                                                                                                                                                                                            | 5, Table 1                                                                    |
| Risk of bias within studies   | 19 | Present data on risk of bias of each study and, if available, any outcome level assessment.                                                                                                                                                                                                                                                                                                                                                             | 6, Supplementary Figure 1, Supplementary Table 6, Supplementary Table 7       |
| Results of individual studies | 20 | For all outcomes considered (benefits or harms), present, for each study: 1) simple summary data for each intervention group, and 2) effect estimates and confidence intervals. <i>Modified approaches may be needed to deal with information from larger networks.</i>                                                                                                                                                                                 | Table 1, Figure3, Supplementary Table 5                                       |
| Synthesis of results          | 21 | Present results of each meta-analysis done, including confidence/credible intervals. In larger networks, authors may focus on comparisons versus a particular comparator (e.g., placebo or standard care), with full findings presented in an appendix. League tables and forest plots may be considered to summarize pair-wise comparisons. If additional summary measures were explored (such as treatment rankings), these should also be presented. | 6-7, Figure2, Figure3, Figure4, Supplementary Table 5, Supplementary Figure 4 |
| Exploration for inconsistency | S5 | Describe results from investigations of inconsistency. This may include such information as measures of model fit to compare consistency and inconsistency models, P values from statistical tests, or summary of inconsistency estimates from different parts of the treatment network.                                                                                                                                                                | 6, Supplementary Table 4, Supplementary Figure 3                              |
| Risk of bias across studies   | 22 | Present results of any assessment of risk of bias across studies for the evidence base being studied.                                                                                                                                                                                                                                                                                                                                                   | 6, Supplementary Figure 1                                                     |
| Results of additional analyze | 23 | Give results of additional analyze, if done (e.g., sensitivity or subgroup analyze, meta-regression analyses, alternative network geometries studied, alternative choice of prior distributions for Bayesian analyze, and so forth).                                                                                                                                                                                                                    | NA                                                                            |
| <b>DISCUSSION</b>             |    |                                                                                                                                                                                                                                                                                                                                                                                                                                                         |                                                                               |
| Summary of evidence           | 24 | Summarize the main findings, including the strength of evidence for each main outcome; consider their relevance to key groups (e.g., healthcare providers, users, and policy-makers).                                                                                                                                                                                                                                                                   | 7, 9                                                                          |
| Limitations                   | 25 | Discuss limitations at study and outcome level (e.g., risk of bias), and at review level (e.g., incomplete retrieval of identified research,                                                                                                                                                                                                                                                                                                            | 9                                                                             |



|                |    |                                                                                                                                                                                                                                                                                                                                                                                                                                |   |
|----------------|----|--------------------------------------------------------------------------------------------------------------------------------------------------------------------------------------------------------------------------------------------------------------------------------------------------------------------------------------------------------------------------------------------------------------------------------|---|
|                |    | reporting bias). <i>Comment on the validity of the assumptions, such as transitivity and consistency. Comment on any concerns regarding network geometry (e.g., avoidance of certain comparisons).</i>                                                                                                                                                                                                                         |   |
| Conclusions    | 26 | Provide a general interpretation of the results in the context of other evidence, and implications for future research.                                                                                                                                                                                                                                                                                                        | 9 |
| <b>FUNDING</b> |    |                                                                                                                                                                                                                                                                                                                                                                                                                                |   |
| Funding        | 27 | Describe sources of funding for the systematic review and other support (e.g., supply of data); role of funders for the systematic review. This should also include information regarding whether funding has been received from manufacturers of treatments in the network and/or whether some of the authors are content experts with professional conflicts of interest that could affect use of treatments in the network. |   |

PICOS = population, intervention, comparators, outcomes, study design.

## Supplementary Appendix 2. All RCTs citations included in this study[1-55]

- [1] De Medeiros SA, De Almeida Silva HJ, Do Nascimento RM, Da Silva Maia JB, De Almeida Lins CA, De Souza MC. Mat pilates is as effective as aquatic aerobic exercise in treating women with fibromyalgia: A clinical, randomized and blind trial. *Advances in Rheumatology*. 2020;60(1)
- [2] Gavi MBRO, Vassalo DV, Amaral FT, Macedo DCF, Gava PL, Dantas EM, et al. Strengthening exercises improve symptoms and quality of life but do not change autonomic modulation in fibromyalgia: A randomized clinical trial. *PLoS ONE*. 2014;9(3)
- [3] Glasgow A, Stone TM, Kingsley JD. Resistance exercise training on disease impact, pain catastrophizing and autonomic modulation in women with fibromyalgia. *International journal of exercise science*. 2017;10(8):1184-1195.
- [4] Hernando-Garijo I, Ceballos-Laita L, Mingo-Gómez MT, Medrano-De-la-fuente R, Estébanez-De-miguel E, Martínez-Pérez MN, et al. Immediate effects of a telerehabilitation program based on aerobic exercise in women with fibromyalgia. *International Journal of Environmental Research and Public Health*. 2021;18(4):1-12.
- [5] Izquierdo-Alventosa R, Inglés M, Cortés-Amador S, Gimeno-Mallench L, Chirivella-Garrido J, Kropotov J, et al. Low-intensity physical exercise improves pain catastrophizing and other psychological and physical aspects in women with fibromyalgia: A randomized controlled trial. *International Journal of Environmental Research and Public Health*. 2020;17(10)
- [6] Izquierdo-Alventosa R, Inglés M, Cortés-Amador S, Gimeno-Mallench L, Sempere-Rubio N, Chirivella J, et al. Comparative study of the effectiveness of a low-pressure hyperbaric oxygen treatment and physical exercise in women with fibromyalgia: Randomized clinical trial. *Therapeutic Advances in Musculoskeletal Disease*. 2020;12
- [7] Izquierdo-Alventosa R, Inglés M, Cortés-Amador S, Gimeno-Mallench L, Sempere-Rubio N, Serra-Añó P. Effectiveness of high-frequency transcranial magnetic stimulation and physical exercise in women with fibromyalgia: A randomized controlled trial. *Physical therapy*. 2021;101(10)
- [8] Acosta-Gallego A, Ruiz-Montero PJ, Castillo-Rodríguez A. Land- and pool-based intervention in female fibromyalgia patients: A randomized-controlled trial. *Turkish Journal of Physical Medicine and Rehabilitation*. 2018;64(4):337-343.
- [9] Altan L, Korkmaz N, Bingol Ü, Gunay B. Effect of pilates training on people with fibromyalgia syndrome: A pilot study. *Archives of Physical Medicine and Rehabilitation*. 2009;90(12):1983-1988.
- [10] Andrade A, Siczekowska SM, Vilarino GT. Resistance training improves quality of life and associated factors in patients with fibromyalgia syndrome. *PM and R*. 2019;11(7):703-709.
- [11] Andrade A, Torres Vilarino G, Guimarães Bevilacqua G. What is the effect of strength training on pain and sleep in patients with fibromyalgia? *American journal of physical medicine & rehabilitation*. 2017;96(12):889-893.
- [12] Andrade CP, Zamunér AR, Forti M, Tamburús NY, Silva E. Effects of aquatic training and detraining on women with fibromyalgia: Controlled randomized clinical trial. *European journal of physical and rehabilitation medicine*. 2019;55(1):79-88.
- [13] Arakaki JS, Jennings F, Estrela GQ, Cruz Martinelli VDG, Natour J. Strengthening exercises using swiss ball improve pain, health status, quality of life and muscle strength in patients with fibromyalgia: A randomized controlled trial. *Reumatismo*. 2021;73(1):15-23.
- [14] Assis MR, Silva LE, Barros Alves AM, Pessanha AP, Valim V, Feldman D, et al. A randomized controlled trial of deep water running: Clinical effectiveness of aquatic exercise to treat fibromyalgia. *Arthritis Care and Research*. 2006;55(1):57-65.
- [15] Assumpção A, Matsutani LA, Yuan SL, Santo AS, Sauer J, Mango P, et al. Muscle stretching exercises and resistance training in fibromyalgia: Which is better? A three-arm randomized controlled trial. *European journal of physical and rehabilitation medicine*. 2018;54(5):663-670.
- [16] Baptista AS, Villela AL, Jones A, Natour J. Effectiveness of dance in patients with fibromyalgia: A randomised, single-blind, controlled study. *Clinical and Experimental Rheumatology*. 2012;30(SUPPL.74):S18-S23.
- [17] Bongí SM, Di Felice C, Del Rosso A, Galluccio F, Landi G, Tai G, et al. The efficacy of the rességuier method in the treatment of fibromyalgia syndrome: A randomised controlled trial. *Clinical and Experimental Rheumatology*. 2010;28(6 SUPPL. 63):S46-S50.
- [18] Britto A, Rodrigues V, Dos Santos AM, Rizzini M, Britto P, Britto L, et al. Effects of water- and land-based exercises on quality of life and physical aspects in women with fibromyalgia: A randomized clinical trial. *Musculoskeletal care*. 2020;18(4):459-466.
- [19] Carson JW, Carson KM, Jones KD, Bennett RM, Wright CL, Mist SD. A pilot randomized controlled trial of the yoga of awareness program in the management of fibromyalgia. *Pain*. 2010;151(2):530-539.

- [20] Carvalho MS, Carvalho LC, Menezes FDS, Frazin A, Gomes EDC, Iunes DH. Effects of exergames in women with fibromyalgia: A randomized controlled study. *Games for health journal*. 2020;9(5):358-367.
- [21] Collado-Mateo D, Dominguez-Muñoz FJ, Adsuar JC, Garcia-Gordillo MA, Gusi N. Effects of exergames on quality of life, pain, and disease effect in women with fibromyalgia: A randomized controlled trial. *Archives of Physical Medicine and Rehabilitation*. 2017;98(9):1725-1731.
- [22] Duruturk N, Tuzun EH, Culhaoglu B. Is balance exercise training as effective as aerobic exercise training in fibromyalgia syndrome? *Rheumatology International*. 2014;
- [23] Demir-Göçmen D, Altan L, Korkmaz N, Arabacı R. Effect of supervised exercise program including balance exercises on the balance status and clinical signs in patients with fibromyalgia. *Rheumatology International*. 2013;33(3):743-750.
- [24] Espí-López GV, Inglés M, Ruescas-Nicolau MA, Moreno-Segura N. Effect of low-impact aerobic exercise combined with music therapy on patients with fibromyalgia. A pilot study. *Complementary Therapies in Medicine*. 2016;28:1-7.
- [25] Etnier JL, Karper WB, Gapin JI, Barella LA, Yu KC, Murphy KJ. Exercise, fibromyalgia, and fibrofog: A pilot study. *Journal of Physical Activity and Health*. 2009;6(2):239-246.
- [26] Evcik D, Yigit I, Pusak H, Kavuncu V. Effectiveness of aquatic therapy in the treatment of fibromyalgia syndrome: A randomized controlled open study. *Rheumatology International*. 2008;28(9):885-890.
- [27] Fernandes G, Jennings F, Nery Cabral MV, Pirozzi Buosi AL, Natour J. Swimming improves pain and functional capacity of patients with fibromyalgia: A randomized controlled trial. *Archives of Physical Medicine and Rehabilitation*. 2016;97(8):1269-1275.
- [28] García-Martínez AM, De Paz JA, Márquez S. Effects of an exercise programme on self-esteem, self-concept and quality of life in women with fibromyalgia: A randomized controlled trial. *Rheumatology International*. 2012;32(7):1869-1876.
- [29] Garrido-Ardila EM, González-López-Arza MV, Jiménez-Palomares M, García-Nogales A, Rodríguez-Mansilla J. Effectiveness of acupuncture vs. Core stability training in balance and functional capacity of women with fibromyalgia: A randomized controlled trial. *Clinical rehabilitation*. 2020;34(5):630-645.
- [30] Larsson A, Palstam A, Löfgren M, Ernberg M, Bjersing J, Bileviciute-Ljungar I, et al. Resistance exercise improves muscle strength, health status and pain intensity in fibromyalgia-a randomized controlled trial. *Arthritis Research and Therapy*. 2015;17(1)
- [31] Jones KD, Burckhardt CS, Clark SR, Bennett RM, Potempa KM. A randomized controlled trial of muscle strengthening versus flexibility training in fibromyalgia. *Journal of Rheumatology*. 2002;29(5):1041-1048.
- [32] Kingsley JD, Panton LB, Toole T, Sirithienthad P, Mathis R, McMillan V. The effects of a 12-week strength-training program on strength and functionality in women with fibromyalgia. *Archives of Physical Medicine and Rehabilitation*. 2005;86(9):1713-1721.
- [33] Munguía-Izquierdo D, Legaz-Arrese A. Exercise in warm water decreases pain and improves cognitive function in middle-aged women with fibromyalgia. *Clinical and Experimental Rheumatology*. 2007;25(6):823-830.
- [34] Norouzi E, Hosseini F, Vaezmosavi M, Gerber M, Pühse U, Brand S. Zumba dancing and aerobic exercise can improve working memory, motor function, and depressive symptoms in female patients with fibromyalgia. *European journal of sport science*. 2020;20(7):981-991.
- [35] Olivares PR, Gusi N, Parraca JA, Adsuar JC, Del Pozo-Cruz B. Tilting whole body vibration improves quality of life in women with fibromyalgia: A randomized controlled trial. *Journal of Alternative and Complementary Medicine*. 2011;17(8):723-728.
- [36] Park HK, Song MK, Kim DJ, Choi IS, Han JY. Comparison of core muscle strengthening exercise and stretching exercise in middle-aged women with fibromyalgia a randomized, single-blind, controlled study. *Medicine (United States)*. 2021;100(50):E27854.
- [37] Ribeiro VGC, Lacerda ACR, Santos JM, Coelho-Oliveira AC, Fonseca SF, Prates ACN, et al. Efficacy of whole-body vibration training on brain-derived neurotrophic factor, clinical and functional outcomes, and quality of life in women with fibromyalgia syndrome: A randomized controlled trial. *Journal of Healthcare Engineering*. 2021;2021
- [38] Richards SCM, Scott DL. Prescribed exercise in people with fibromyalgia: Parallel group randomised controlled trial. *British Medical Journal*. 2002;325(7357):185-187.
- [39] Rodríguez-Mansilla J, Mejías-Gil A, Garrido-Ardila EM, Jiménez-Palomares M, Montanero-Fernández J, González-López-arza MV. Effects of non-pharmacological treatment on pain, flexibility, balance and quality of life in women with fibromyalgia: A randomised clinical trial. *Journal of Clinical Medicine*. 2021;10(17)

- [40] Sañudo B, Carrasco L, de Hoyo M, Figueroa A, Saxton JM. Vagal modulation and symptomatology following a 6-month aerobic exercise programme for women with fibromyalgia. *Clinical and Experimental Rheumatology*. 2015;33:S41-S45.
- [41] Sañudo B, Carrasco L, de Hoyo M, McVeigh JG. Effects of exercise training and detraining in patients with fibromyalgia syndrome: A 3-yr longitudinal study. *American journal of physical medicine & rehabilitation / Association of Academic Physiatrists*. 2012;91(7):561-569; quiz 570-573.
- [42] Sañudo B, Galiano D, Carrasco L, de Hoyo M, McVeigh JG. Effects of a prolonged exercise program on key health outcomes in women with fibromyalgia: A randomized controlled trial. *Journal of rehabilitation medicine : official journal of the UEMS European Board of Physical and Rehabilitation Medicine*. 2011;43(6):521-526.
- [43] Sarmento CVM, Moon S, Pfeifer T, Smirnova IV, Colgrove Y, Lai SM, et al. The therapeutic efficacy of qigong exercise on the main symptoms of fibromyalgia: A pilot randomized clinical trial. *Integrative Medicine Research*. 2020;9(4)
- [44] Sevimli D, Kozanoglu E, Guzel R, Doganay A. The effects of aquatic, isometric strength-stretching and aerobic exercise on physical and psychological parameters of female patients with fibromyalgia syndrome. *Journal of physical therapy science*. 2015;27(6):1781-1786.
- [45] Tomas-Carus P, Branco JC, Raimundo A, Parraca JA, Batalha N, Biehl-Printes C. Breathing exercises must be a real and effective intervention to consider in women with fibromyalgia: A pilot randomized controlled trial. *Journal of Alternative and Complementary Medicine*. 2018;24(8):825-832.
- [46] Tomas-Carus P, Gusi N, Häkkinen A, Häkkinen K, Leal A, Ortega-Alonso A. Eight months of physical training in warm water improves physical and mental health in women with fibromyalgia: A randomized controlled trial. *Journal of Rehabilitation Medicine*. 2008;40(4):248-252.
- [47] Tomas-Carus P, Häkkinen A, Gusi N, Leal A, Häkkinen K, Ortega-Alonso A. Aquatic training and detraining on fitness and quality of life in fibromyalgia. *Medicine and Science in Sports and Exercise*. 2007;39(7):1044-1050.
- [48] Valim V, Oliveira L, Suda A, Silva L, De Assis M, Neto TB, et al. Aerobic fitness effects in fibromyalgia. *Journal of Rheumatology*. 2003;30(5):1060-1069.
- [49] Villafaina S, Borrega-mouquinho Y, Fuentes-garcía JP, Collado-mateo D, Gusi N. Effect of exergame training and detraining on lower-body strength, agility, and cardiorespiratory fitness in women with fibromyalgia: Single-blinded randomized controlled trial. *International Journal of Environmental Research and Public Health*. 2020;17(1)
- [50] Villafaina S, Collado-Mateo D, Domínguez-Muñoz FJ, Fuentes-García JP, Gusi N. Benefits of 24-week exergame intervention on health-related quality of life and pain in women with fibromyalgia: A single-blind, randomized controlled trial. *Games for health journal*. 2019;8(6):380-386.
- [51] Horven Wigert S, Stiles TC, Vogel PA. Effects of aerobic exercise versus stress management treatment in fibromyalgia. *Scandinavian Journal of Rheumatology*. 1996;25(2):77-86.
- [52] Wong A, Figueroa A, Sanchez-Gonzalez MA, Son WM, Chernykh O, Park SY. Effectiveness of tai chi on cardiac autonomic function and symptomatology in women with fibromyalgia: A randomized controlled trial. *Journal of aging and physical activity*. 2018;26(2):214-221.
- [53] Haak T, Scott B. The effect of qigong on fibromyalgia (fms): A controlled randomized study. *Disabil Rehabil*. 2008;30(8):625-633.
- [54] Mingorance JA, Montoya P, Miranda JGV, Riquelme I. A comparison of the effect of two types of whole body vibration platforms on fibromyalgia. A randomized controlled trial. *International Journal of Environmental Research and Public Health*. 2021;18(6):1-14.
- [55] Van Eijk-Hustings Y, Kroese M, Tan F, Boonen A, Bessems-Beks M, Landewé R. Challenges in demonstrating the effectiveness of multidisciplinary treatment on quality of life, participation and health care utilisation in patients with fibromyalgia: A randomised controlled trial. *Clinical Rheumatology*. 2013;32(2):199-209.
- [56] NCT01797263 [Pain Outcomes Comparing Yoga Versus Structured Exercise \(POYSE\) Trial - Study Results - ClinicalTrials.gov](https://clinicaltrials.gov/ct2/show/study/NCT01797263)
- [57] NCT00383084 [Lifestyle Physical Activity to Reduce Pain and Fatigue in Adults With Fibromyalgia - Study Results - ClinicalTrials.gov](https://clinicaltrials.gov/ct2/show/study/NCT00383084)
